# Supplementary material for: The Growing Importance of Social Skills in the Labor Market*
Source: Oxford University Press journal article supplement (doi:10.1093/qje/qjx022), 2017-06-03
Supplement: qjx022_supp.pdf [file qjx022_supp.pdf]

**Appendix materials for “The Growing Importance of Social Skills in the  
Labor Market”**

**David J. Deming  
April 2017**

**NOT FOR PUBLICATION**

## **Table of Contents**

Figure A.1: Social Skills Measure Robust to Alternative Definitions

Figure A.2: Comparison of DOT and O\*NET Task Measures

Figure A.3: Smoothed Changes in Employment by Occupational Task Intensity

Figure A.4: Smoothed Changes in Median Wages by Occupational Task Intensity

Table A.1: Correlation between Routine and Social Skill Task Intensity

Table A.2: Labor Market Returns to Skills in the NLSY79 (in levels)

Table A.3: Heterogeneity in Returns to Skills (in logs)

Table A.4: Heterogeneity in Returns to Skills (in levels)

Table A.5: Changes in Employment by Occupation Task Intensity in the Census/ACS

Table A.6: Changes in Wages by Occupation Task Intensity in the Census/ACS

Data Appendix

Model Appendix

FIGURE A.1

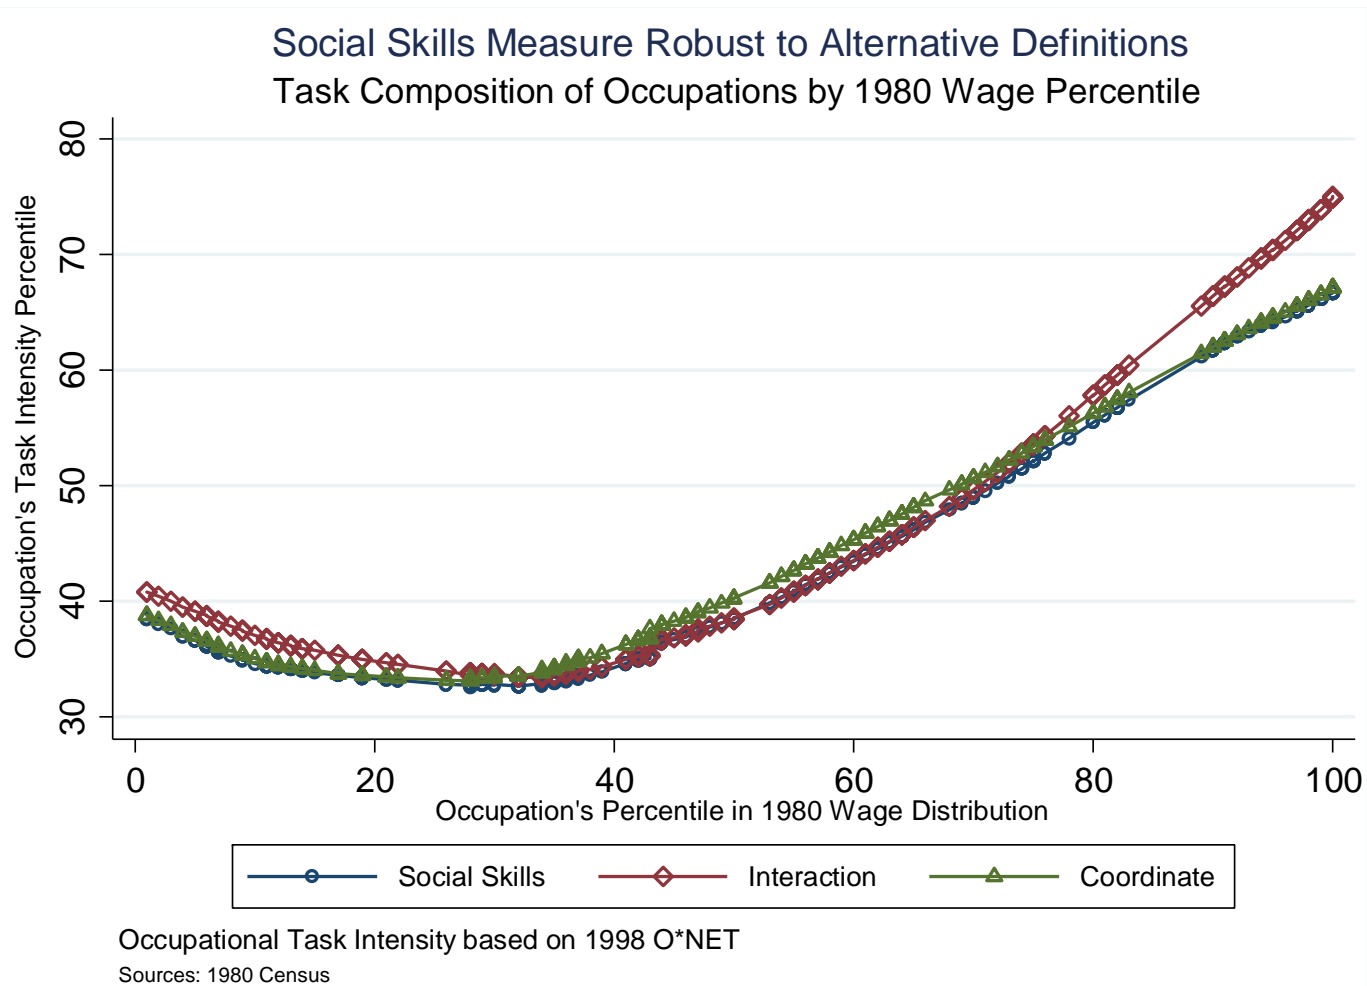

Each line plots the average task intensity of occupations by wage percentile, smoothed using a locally weighted regression with bandwidth 0.8. Task intensity is measured as an occupation's employment-weighted percentile rank in the Census IPUMS 1980 5 percent extract. All task intensities are taken from the 1998 O\*NET. Mean log wages in each occupation are calculated using workers' hours of annual labor supply times the Census sampling weights. Consistent occupation codes for 1980-2012 are updated from Autor and Dorn (2013) and Autor and Price (2013).

FIGURE A.2

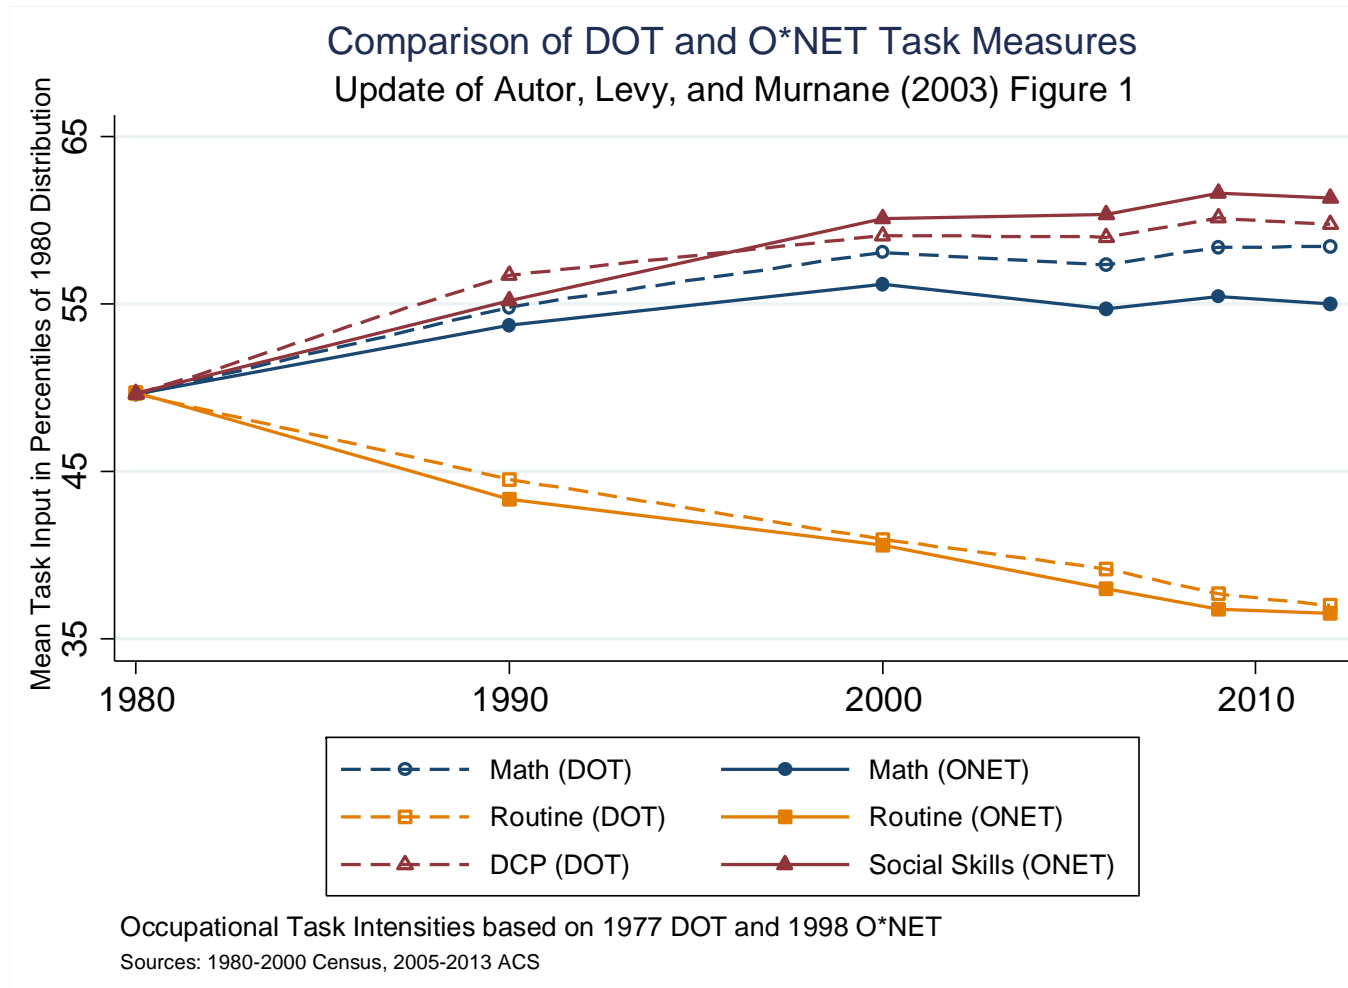

O\*NET 1998 and DOT 1977 task measures by occupation are paired with data from the IPUMS 1980-2000 Censuses and the 2005-2013 American Community Survey samples. Consistent occupation codes for 1980-2012 are updated from Autor and Dorn (2013) and Autor and Price (2013). Data are aggregated to industry-education-sex cells by year, and each cell is assigned a value corresponding to its rank in the 1980 distribution of task input. Plotted values depict the employment-weighted mean of each assigned percentile in the indicated year. See the text and Appendix for details on the construction of O\*NET task measures.

FIGURE A.3

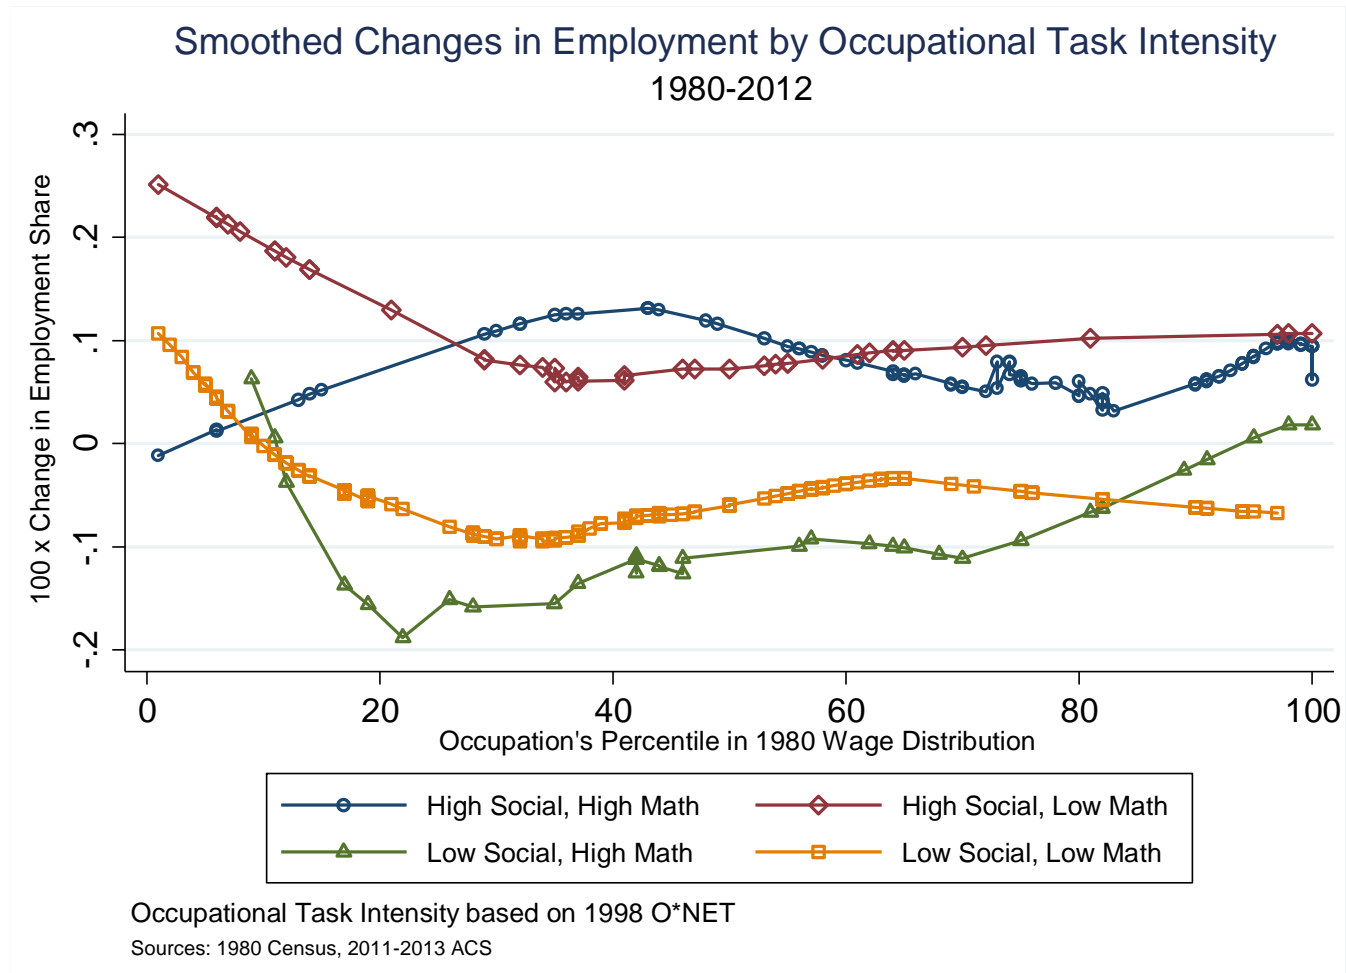

Each line plots 100 times the change in employment share between 1980 and 2012 for occupations that are above and/or below the 50<sup>th</sup> percentile in nonroutine analytical and social skill task intensity as measured by the 1998 O\*NET. Lines are smoothed using a locally weighted regression with bandwidth 1.0. Wage percentiles are measured as the employment-weighted percentile rank of an occupation's mean log wage in the Census IPUMS 1980 5 percent extract. Consistent occupation codes for 1980-2012 are updated from Autor and Dorn (2013) and Autor and Price (2013). See the text and Appendix for details on the construction of O\*NET task measures.

FIGURE A.4

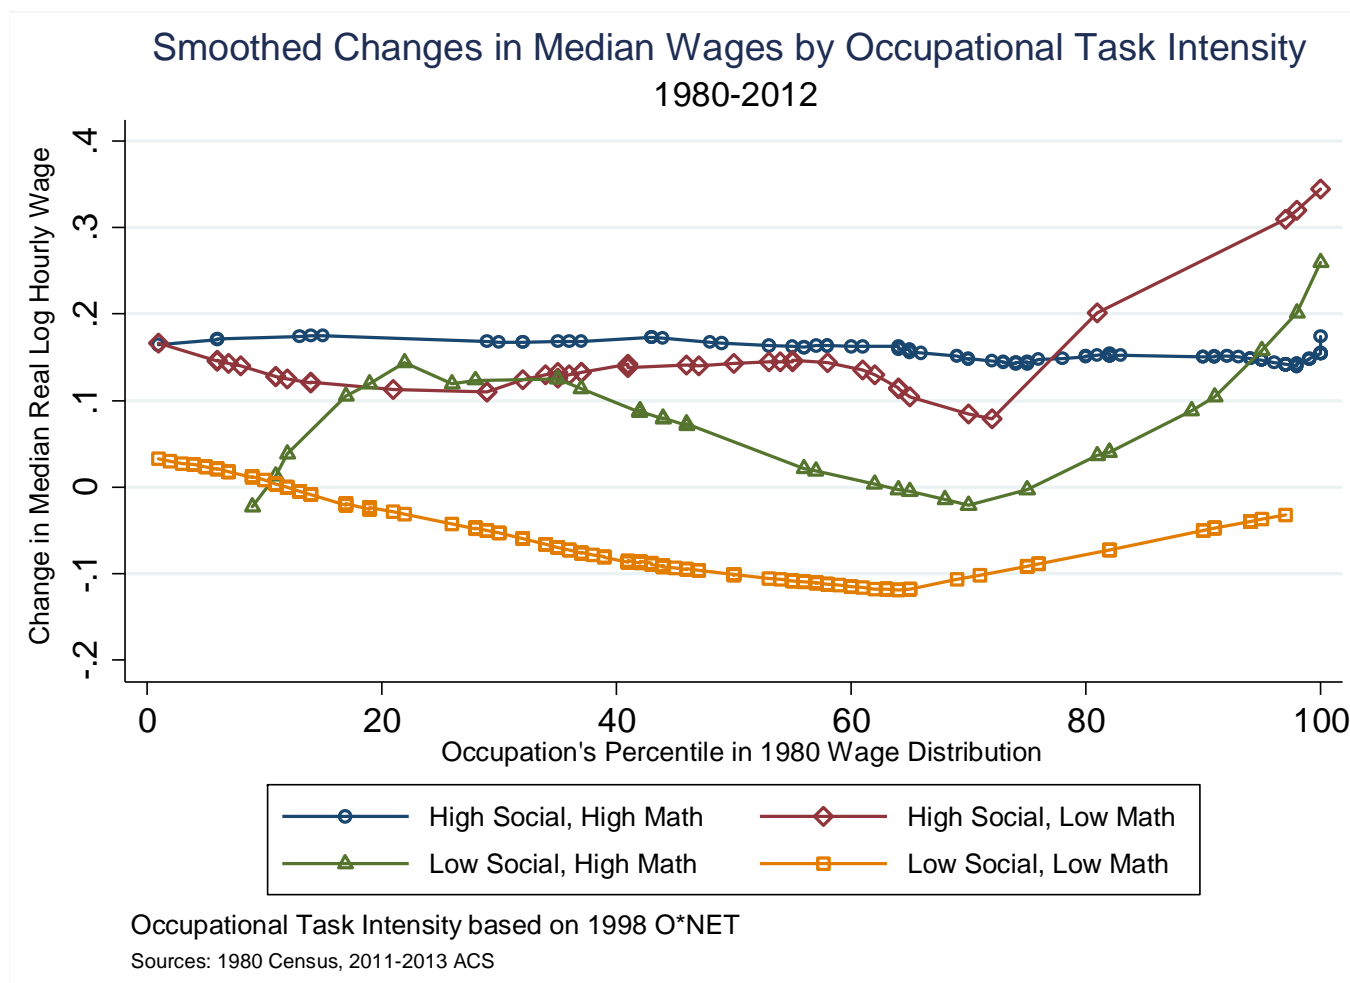

Each line plots 100 times the change in median log hourly real wages between 1980 and 2012 for occupations that are above and/or below the 50<sup>th</sup> percentile in nonroutine analytical and social skill task intensity as measured by the 1998 O\*NET. Lines are smoothed using a locally weighted regression with bandwidth 1.0. Wage percentiles on the horizontal axis are measured as the employment-weighted percentile rank of an occupation's mean log wage in the Census IPUMS 1980 5 percent extract. Consistent occupation codes for 1980-2012 are updated from Autor and Dorn (2013) and Autor and Price (2013). See the text and Appendix for details on the construction of O\*NET task measures.

**TABLE A.1**  
**CORRELATION BETWEEN ROUTINE AND SOCIAL SKILL TASK INTENSITY**

| <i>Outcome is the Routine Task Intensity of an Occupation</i> | (1)                  | (2)                  |
|---------------------------------------------------------------|----------------------|----------------------|
| Social Skill Intensity of Occupation                          | -0.679***<br>[0.113] | -0.560***<br>[0.155] |
| Add Other O*NET and DOT tasks                                 |                      | X                    |
| Observations                                                  | 337                  | 337                  |
| R-squared                                                     | 0.439                | 0.662                |

*Notes:* Data from the 1980-2000 Census, 2006-2013 ACS, 1991 DOT, and 1998-2013 O\*NET. Observations are at the occupation level. Additional DOT task measures are nonroutine analytical, nonroutine interactive, routine cognitive, routine manual and nonroutine manual. Additional O\*NET task measures are Number Facility, Inductive/Deductive Reasoning, Use/Analyze Information, the Service task composite and Require Social Interaction. See text and Appendix for details on all O\*NET task measures. All models also control for median log hourly wage and are weighted by total labor supply in each cell. Standard errors are clustered at the occupation level. \*\*\* p<0.01, \*\* p<0.05, \* p<0.10

**TABLE A.2**  
**LABOR MARKET RETURNS TO COGNITIVE SKILLS AND SOCIAL SKILLS IN THE NLSY79**

| <i>Outcome is Hourly Wage (in 2012 dollars)</i> | (1)     | (2)     | (3)     | (4)     | (5)     |
|-------------------------------------------------|---------|---------|---------|---------|---------|
| Cognitive Skills (AQT, standardized)            |         | 4.36*** | 4.35*** | 3.95*** | 2.32*** |
|                                                 |         | [0.17]  | [0.16]  | [0.17]  | [0.18]  |
| Social Skills (standardized)                    | 2.67*** | 1.59*** | 1.20*** | 1.07*** | 0.75*** |
|                                                 |         | [0.15]  | [0.12]  | [0.12]  | [0.12]  |
| Cognitive * Social                              |         |         | 1.04*** | 1.04*** | 0.74*** |
|                                                 |         |         | [0.17]  | [0.16]  | [0.16]  |
| Non-cognitive Skills (standardized)             |         |         |         | 1.12*** | 0.89*** |
|                                                 |         |         |         | [0.15]  | [0.15]  |
| Demographics and Age / Year Fixed Effects       |         | X       | X       | X       | X       |
| Years of completed education                    |         |         |         |         | X       |
| R-squared                                       | 0.132   | 0.171   | 0.173   | 0.176   | 0.195   |
| Observations                                    | 133,603 | 133,603 | 133,603 | 133,539 | 133,539 |

*Notes:* Each column reports results from an estimate of equation (18) in the paper, with real hourly wages as the outcome and person-year as the unit of observation. The data source is the National Longitudinal Survey of Youth 1979 cohort (NLSY79). Cognitive skills are measured by each NLSY79 respondent's score on the Armed Forces Qualifying Test (AFQT), and are normalized to have a mean of zero and a standard deviation of one. I use the AFQT score crosswalk developed by Altonji, Bharadwaj and Lange (2012). Social skills is a standardized composite of four variables - 1) sociability in childhood; 2) sociability in adulthood; 3) participation in high school clubs; and 4) participation in team sports - see the text for details on construction of the social skills measure. My measure of "non-cognitive" skills is the normalized average of the Rotter and Rosenberg scores in the NLSY. The regression also controls for race-by-gender indicator variables, age, year, census region, and urbanicity fixed effects - plus additional controls as indicated. Standard errors are in brackets and clustered at the individual level. \*\*\* p<0.01, \*\* p<0.05, \* p<0.10



**TABLE A.3**  
**HETEROGENEITY IN RETURNS TO SKILLS**

| <i>Outcome is Log Hourly Wage</i><br><i>(in 2012 dollars)</i> | Males               | Females             | Nonwhite            | White               | No College          | Some College        |
|---------------------------------------------------------------|---------------------|---------------------|---------------------|---------------------|---------------------|---------------------|
|                                                               | (1)                 | (2)                 | (3)                 | (4)                 | (5)                 | (6)                 |
| Cognitive Skills (AQT, standardized)                          | 0.167***<br>[0.009] | 0.213***<br>[0.010] | 0.208***<br>[0.009] | 0.185***<br>[0.008] | 0.131***<br>[0.010] | 0.169***<br>[0.012] |
| Social Skills (standardized)                                  | 0.055***<br>[0.008] | 0.036***<br>[0.008] | 0.017*<br>[0.009]   | 0.044***<br>[0.008] | 0.027***<br>[0.009] | 0.032***<br>[0.009] |
| Cognitive * Social                                            | 0.031***<br>[0.008] | 0.004<br>[0.008]    | -0.010<br>[0.009]   | 0.023***<br>[0.008] | -0.002<br>[0.008]   | 0.021**<br>[0.010]  |
| Non-cognitive Skills (standardized)                           | 0.050***<br>[0.009] | 0.047***<br>[0.009] | 0.056***<br>[0.008] | 0.046***<br>[0.008] | 0.036***<br>[0.008] | 0.051***<br>[0.009] |
| Demographics and Age / Year Fixed Effects                     | X                   | X                   | X                   | X                   | X                   | X                   |
| R-squared                                                     | 0.361               | 0.294               | 0.324               | 0.346               | 0.335               | 0.319               |
| Observations                                                  | 65,008              | 61,187              | 57,135              | 69,060              | 67,841              | 58,354              |

*Notes:* Each column reports results from an estimate of equation (18) in the paper, with the natural log of real hourly wages as the outcome and person-year as the unit of observation. The data source is the National Longitudinal Survey of Youth 1979 cohort (NLSY79). Cognitive skills are measured by each NLSY79 respondent's score on the Armed Forces Qualifying Test (AFQT), and are normalized to have a mean of zero and a standard deviation of one. I use the AFQT score crosswalk developed by Altonji, Bharadwaj and Lange (2012). Social skills is a standardized composite of four variables - 1) sociability in childhood; 2) sociability in adulthood; 3) participation in high school clubs; and 4) participation in team sports - see the text for details on construction of the social skills measure. My measure of "non-cognitive" skills is the normalized average of the Rotter and Rosenberg scores in the NLSY. The regression also controls for race-by-gender indicator variables, age, year, census region, and urbanicity fixed effects - plus additional controls as indicated. Standard errors are in brackets and clustered at the individual level. \*\*\* p<0.01, \*\* p<0.05, \* p<0.10

**TABLE A.4**  
**HETEROGENEITY IN RETURNS TO SKILLS**

| <i>Outcome is Hourly Wage (in 2012 dollars)</i> | Males             | Females           | Nonwhite          | White             | No<br>College     | Some<br>College   |
|-------------------------------------------------|-------------------|-------------------|-------------------|-------------------|-------------------|-------------------|
|                                                 | (1)               | (2)               | (3)               | (4)               | (5)               | (6)               |
| Cognitive Skills (AQT, standardized)            | 3.93***<br>[0.25] | 3.73***<br>[0.21] | 3.89***<br>[0.19] | 3.96***<br>[0.20] | 1.95***<br>[0.18] | 3.92***<br>[0.31] |
| Social Skills (standardized)                    | 1.48***<br>[0.22] | 0.76***<br>[0.13] | 0.66***<br>[0.21] | 1.00***<br>[0.16] | 0.75***<br>[0.16] | 0.66***<br>[0.19] |
| Cognitive * Social                              | 1.46***<br>[0.26] | 0.61***<br>[0.18] | 0.31<br>[0.21]    | 1.19***<br>[0.22] | 0.13<br>[0.16]    | 1.17***<br>[0.27] |
| Non-cognitive Skills (standardized)             | 1.45***<br>[0.24] | 0.85***<br>[0.19] | 0.94***<br>[0.14] | 1.17***<br>[0.19] | 0.55***<br>[0.14] | 1.42***<br>[0.25] |
| Demographics and Age / Year Fixed Effects       | X                 | X                 | X                 | X                 | X                 | X                 |
| R-squared                                       | 0.176             | 0.133             | 0.157             | 0.173             | 0.116             | 0.181             |
| Observations                                    | 68,187            | 65,352            | 60,012            | 73,527            | 68,322            | 65,217            |

*Notes:* Each column reports results from an estimate of equation (18) in the paper, with real hourly wages as the outcome and person-year as the unit of observation. The data source is the National Longitudinal Survey of Youth 1979 cohort (NLSY79). Cognitive skills are measured by each NLSY79 respondent's score on the Armed Forces Qualifying Test (AFQT), and are normalized to have a mean of zero and a standard deviation of one. I use the AFQT score crosswalk developed by Altonji, Bharadwaj and Lange (2012). Social skills is a standardized composite of four variables - 1) sociability in childhood; 2) sociability in adulthood; 3) participation in high school clubs; and 4) participation in team sports - see the text for details on construction of the social skills measure. My measure of "non-cognitive" skills is the normalized average of the Rotter and Rosenberg scores in the NLSY. The regression also controls for race-by-gender indicator variables, age, year, census region, and urbanicity fixed effects - plus additional controls as indicated. Standard errors are in brackets and clustered at the individual level. \*\*\* p<0.01, \*\* p<0.05, \* p<0.10

**TABLE A.5**  
**CHANGES IN EMPLOYMENT BY OCCUPATION TASK INTENSITY IN THE CENSUS/ACS**

|                                                | 1980-2012 |         | 1980-1990 |         | 1990-2000 | 2000-2012 | 2000-2012 |
|------------------------------------------------|-----------|---------|-----------|---------|-----------|-----------|-----------|
| <i>Outcome is Log Employment (LS Weighted)</i> | (1)       | (2)     | (3)       | (4)     | (5)       | (6)       | (7)       |
| Math Task Intensity                            | -0.053**  | -0.075* | -0.127    | 0.130** | -0.196**  | -0.054    | -0.117**  |
|                                                | [0.024]   | [0.042] | [0.099]   | [0.058] | [0.089]   | [0.048]   | [0.056]   |
| Social Skill Task Intensity                    | 0.054***  | 0.029   | -0.025    | 0.003   | 0.052     | -0.050    | -0.069*   |
|                                                | [0.019]   | [0.038] | [0.071]   | [0.045] | [0.049]   | [0.036]   | [0.036]   |
| Math * Social                                  |           | 0.006   | 0.018*    | 0.002   | 0.001     | 0.012*    | 0.019***  |
|                                                |           | [0.008] | [0.010]   | [0.007] | [0.009]   | [0.007]   | [0.007]   |
| Routine Task Intensity                         |           |         | -0.049    | -0.012  | -0.018    | -0.024    | -0.019    |
|                                                |           |         | [0.039]   | [0.020] | [0.031]   | [0.017]   | [0.019]   |
| Service Task Intensity                         |           |         | 0.036     | -0.019  | 0.023     | 0.034**   | 0.028     |
|                                                |           |         | [0.040]   | [0.024] | [0.029]   | [0.016]   | [0.020]   |
| Sex-Education-Industry Fixed Effects           | X         | X       | X         | X       | X         | X         | X         |
| Controls for other O*NET Task Measures         |           |         | X         | X       | X         | X         | X         |
| Exclude Mgmt, Health Care and Education        |           |         |           |         |           |           | X         |
| R-squared                                      | 0.516     | 0.516   | 0.521     | 0.714   | 0.663     | 0.716     | 0.698     |
| Observations                                   | 74,212    | 74,212  | 74,212    | 74,212  | 74,212    | 74,212    | 60,739    |

*Notes:* Each column reports results from a regression of the natural log of employment in the indicated end year on log employment in the indicated base year, the O\*NET task measures and sex-education-industry fixed effects. The data come from the 1980-2000 U.S. Censuses and the 2005-2013 American Community Surveys and are collapsed to year-occupation-industry-sex-education cells, with each cell weighted by labor supply. The O\*NET task measures are percentiles that range from 0 to 10 and are weighted by labor supply to conform to the 1980 occupation distribution. The additional O\*NET task measures are the O\*NET variables Number Facility, Inductive and Deductive Reasoning, and Analyzing and Using Information, Require Social Interaction, Coordinating the Work and Activities of Others, and Communicating with Supervisors, Peers, or Subordinates.. See the text and Appendix for details on the construction of each O\*NET task measure and for details on which occupations are classified as Managers, Health Care or Education (Column 7). Standard errors are in brackets and clustered at the occupation level. \*\*\* p<0.01, \*\* p<0.05, \* p<0.10

**TABLE A.6**  
**CHANGES IN WAGES BY OCCUPATION TASK INTENSITY IN THE CENSUS/ACS**

|                                         | 1980-2012             |                       | 1980-1990             | 1990-2000              | 2000-2012              | 2000-2012             |                        |
|-----------------------------------------|-----------------------|-----------------------|-----------------------|------------------------|------------------------|-----------------------|------------------------|
| <i>Outcome is the Log Hourly Wage</i>   | (1)                   | (2)                   | (3)                   | (4)                    | (5)                    | (6)                   | (7)                    |
| Math Task Intensity                     | 0.0451***<br>[0.0069] | 0.0418***<br>[0.0101] | 0.0007<br>[0.0230]    | 0.0044<br>[0.0165]     | 0.0046<br>[0.0162]     | 0.0003<br>[0.0207]    | -0.0060<br>[0.0250]    |
| Social Skill Task Intensity             | 0.0492***<br>[0.0059] | 0.0453***<br>[0.0124] | 0.0615***<br>[0.0159] | 0.0532***<br>[0.0117]  | 0.0434***<br>[0.0113]  | 0.0564***<br>[0.0143] | 0.0675***<br>[0.0157]  |
| Math * Social                           |                       | 0.0009<br>[0.0024]    | -0.0029<br>[0.0023]   | -0.0020<br>[0.0018]    | -0.0012<br>[0.0016]    | -0.0028<br>[0.0021]   | -0.0032<br>[0.0025]    |
| Routine Task Intensity                  |                       |                       | 0.0034<br>[0.0057]    | 0.0038<br>[0.0046]     | 0.0027<br>[0.0042]     | 0.0028<br>[0.0051]    | 0.0049<br>[0.0052]     |
| Service Task Intensity                  |                       |                       | -0.0126<br>[0.0085]   | -0.0216***<br>[0.0063] | -0.0150***<br>[0.0058] | -0.0118<br>[0.0077]   | -0.0255***<br>[0.0097] |
| Sex-Education-Industry Fixed Effects    | X                     | X                     | X                     | X                      | X                      | X                     | X                      |
| Controls for other O*NET Task Measures  |                       |                       | X                     | X                      | X                      | X                     | X                      |
| Exclude Mgmt, Health Care and Education |                       |                       |                       |                        |                        |                       | X                      |
| R-squared                               | 0.501                 | 0.501                 | 0.516                 | 0.564                  | 0.557                  | 0.525                 | 0.501                  |
| Observations                            | 74,212                | 74,212                | 74,212                | 74,212                 | 74,212                 | 74,212                | 60,739                 |

*Notes:* Each column reports results from a regression of the natural log of real (indexed to 2012) median hourly wages in the indicated end year on log hourly wages in the indicated base year, the O\*NET task measures and sex-education-industry fixed effects. The data come from the 1980-2000 U.S. Censuses and the 2005-2013 American Community Surveys and are collapsed to year-occupation-industry-sex-education cells, with each cell weighted by labor supply. The O\*NET task measures are percentiles that range from 0 to 10 and are weighted by labor supply to conform to the 1980 occupation distribution. The additional O\*NET task measures are the O\*NET variables Number Facility, Inductive and Deductive Reasoning, and Analyzing and Using Information, Require Social Interaction, Coordinating the Work and Activities of Others, and Communicating with Supervisors, Peers, or Subordinates. See the text and Appendix for details on the construction of each O\*NET task measure and for details on which occupations are classified as Managers, Health Care or Education (Column 7). Standard errors are in brackets and clustered at the occupation level. \*\*\* p<0.01, \*\* p<0.05, \* p<0.10

# Data Appendix

January 2016

## 1 Changes to the *Occ1990dd* Occupation System

I made edits to the Autor and Dorn (2013) *Occ1990dd* Occupation System to:

1. extend the system to cover the 2010 Census/ACS occupation codes;
2. attempt to improve consistency of definitions of occupations over time; and
3. disaggregate codes in *occ1990dd* when possible.

This edited and updated version of the *occ1990dd* occupation system contains 341 occupation codes.

### 1.1 2010 Occupation Codes

To extend the system to cover the 2010 occupation codes, I examined the mapping between the 2005-2009 ACS OCC codes and the 2010-2013 ACS OCC codes.<sup>1</sup> For each 2010 OCC code with an equivalent 2005 OCC code, I assigned the *occ1990dd* code that was associated with the equivalent 2005 OCC code, as given by Autor and Dorn's crosswalk between *occ1990dd* codes and 2005 OCC codes. For example, the 2005 OCC code 12 (Financial Managers) is mapped to the in the *occ1990dd* code 7. Therefore, I map the 2010 OCC code 120 (Financial Managers) to the *occ1990dd* code 7 as well. For the few new 2010 OCC codes that did not have an obvious equivalent in the set of 2005 OCC codes, I used my best judgment. For example, I mapped the 2010 OCC code 0425 (Emergency Management Directors) to *occ1990dd* code 22 (Managers and administrators, n.e.c.). Using this procedure, I created a crosswalk between the 2010 Census/ACS occupation codes and the existing *occ1990dd* codes provided by Autor and Dorn.

### 1.2 Improving Consistency of Definitions Over Time

After creating the crosswalk between the 2010 occupation codes and the existing *occ1990dd* codes, I attempted to improve the consistency of definitions of occupations over time. To do so, I examined each *occ1990dd* code and the associated 1980, 1990, 2000, 2005, and now 2010 OCC codes. I checked for consistency in definitions across time, using the 1990-2000 OCC codes crosswalk in Table 2 of Scopp (2003) as a reference. When I found an inconsistency, I attempted to resolve it by remapping OCC codes to the appropriate *occ1990dd* code. For example, prior to editing, the *occ1990dd* code 308 (Computer and peripheral equipment operators) was linked to the 1980 and 1990 OCC codes: 304, 308, and 309 and the 2000 OCC code 580 as shown in Panel A of Table 1.

---

<sup>1</sup>Retrieved from <https://usa.ipums.org/usa/volii/c2ssoccup.shtml> on July 17, 2015

Table 1: Improving Consistency of Definitions (Example)

**Panel A: *Occ1990dd* codes 303 and 308, prior to editing**

| <i>Occ1990dd</i> code                                   | 1980 Census Codes                                                                                                                     | 1990 Census Codes                                                                                                                     | 2000 Census (5% Sample) Codes                                                             | 2005 ACS Codes                                                                            | 2010 ACS Codes                                                                             |
|---------------------------------------------------------|---------------------------------------------------------------------------------------------------------------------------------------|---------------------------------------------------------------------------------------------------------------------------------------|-------------------------------------------------------------------------------------------|-------------------------------------------------------------------------------------------|--------------------------------------------------------------------------------------------|
| <b>303</b> -Office supervisors                          | <b>303</b> -Supervisors, general office<br><b>305</b> -Supervisors, financial records processing                                      | <b>303</b> -Supervisors, general office<br><b>305</b> -Supervisors, financial records processing                                      | <b>500</b> -First-line supervisors/ managers of office and administrative support workers | <b>500</b> -First-line supervisors/ managers of office and administrative support workers | <b>5000</b> -First-line supervisors/ managers of office and administrative support workers |
| <b>308</b> -Computer and peripheral equipment operators | <b>304</b> -Supervisors, computer equipment operators<br><b>308</b> -Computer operators<br><b>309</b> -Peripheral equipment operators | <b>304</b> -Supervisors, computer equipment operators<br><b>308</b> -Computer operators<br><b>309</b> -Peripheral equipment operators | <b>580</b> -Computer operators                                                            | <b>580</b> -Computer operators                                                            | <b>5800</b> -Computer operators                                                            |

**Panel B: *Occ1990dd* codes 303 and 308, after editing**

| <i>Occ1990dd</i> code                                   | 1980 Census Codes                                                                                                                                         | 1990 Census Codes                                                                                                                                         | 2000 Census (5% Sample) Codes                                                             | 2005 ACS Codes                                                                            | 2010 ACS Codes                                                                             |
|---------------------------------------------------------|-----------------------------------------------------------------------------------------------------------------------------------------------------------|-----------------------------------------------------------------------------------------------------------------------------------------------------------|-------------------------------------------------------------------------------------------|-------------------------------------------------------------------------------------------|--------------------------------------------------------------------------------------------|
| <b>303</b> -Office supervisors                          | <b>303</b> -Supervisors, general office<br><b>304</b> -Supervisors, computer equipment operators<br><b>305</b> -Supervisors, financial records processing | <b>303</b> -Supervisors, general office<br><b>304</b> -Supervisors, computer equipment operators<br><b>305</b> -Supervisors, financial records processing | <b>500</b> -First-line supervisors/ managers of office and administrative support workers | <b>500</b> -First-line supervisors/ managers of office and administrative support workers | <b>5000</b> -First-line supervisors/ managers of office and administrative support workers |
| <b>308</b> -Computer and peripheral equipment operators | <b>308</b> -Computer operators<br><b>309</b> -Peripheral equipment operators                                                                              | <b>308</b> -Computer operators<br><b>309</b> -Peripheral equipment operators                                                                              | <b>580</b> -Computer operators                                                            | <b>580</b> -Computer operators                                                            | <b>5800</b> -Computer operators                                                            |

According to Scopp’s (2003) 1990-2000 crosswalk, the 1990 OCC code 304 (Supervisors, computer equipment operators) gets entirely redistributed into the 2000 OCC code 500 (First-line supervisors/managers of office and administrative support workers), which is linked to *occ1990dd* code 303 (Office supervisors). Therefore, I remap the 1980 and 1990 OCC code 304 to the *occ1990dd* code 303 (Office supervisors) so that supervisors of computer equipment operators are consistently contained over time in the *occ1990dd* code 303. In contrast, the 1990 OCC code 309 (Peripheral equipment operators) largely redistributes into the 2000 OCC code 580 (Computer operators), so the 1980 and 1990 OCC code 309 remains mapped to *occ1990dd* code 308 as shown in Panel B of Table 1.

### 1.3 Disaggregating Codes

To disaggregate *occ1990dd* codes when possible, I also examined each *occ1990dd* code and the associated 1980, 1990, 2000, 2005, and 2010 OCC codes. Among the codes associated with each *occ1990dd* code, I searched for a set of 1980, 1990, 2000, 2005, and 2010 OCC codes that provided a consistent definition of an occupation that could stand alone as a separate occupation group. For example, prior to editing, the

*occ1990dd* code 59 (Engineers and other professionals, n.e.c.) was mapped to OCC codes as shown in Panel A of Table 2. Among this group of codes, the occupation Marine Engineers and Naval Architects can be separated into its own group. Therefore, I created an additional *occ1990dd* code 58 (Marine engineers and naval architects) consisting of 1980 OCC code 58, 1990 OCC code 58, 2000 OCC code 144, 2005 OCC code 144, and 2010 OCC code 1440 as shown in Panel B of Table 2.

In contrast, the occupation Nuclear Engineers cannot stand alone as its own *occ1990dd* code. The occupation Nuclear Engineers has its own OCC code in 1980 (49), 1990 (49), and 2000 (151), but the occupation is joined with the miscellaneous engineers OCC code 153 in 2005 and 2010. This occupation cannot be separated from the other codes associated with *occ1990dd* code 59 (Engineers and other professionals, n.e.c.).

Table 2: Disaggregating Codes (Example)

**Panel A: *Occ1990dd* code 59, prior to editing**

| <i>Occ1990dd</i> code                        | 1980 Census Codes                                                                                                    | 1990 Census Codes                                                                                                    | 2000 Census (5% Sample) Codes                                                                                                                      | 2005 ACS Codes                                                                                                                                                                   | 2010 ACS Codes                                                                                                                                                                       |
|----------------------------------------------|----------------------------------------------------------------------------------------------------------------------|----------------------------------------------------------------------------------------------------------------------|----------------------------------------------------------------------------------------------------------------------------------------------------|----------------------------------------------------------------------------------------------------------------------------------------------------------------------------------|--------------------------------------------------------------------------------------------------------------------------------------------------------------------------------------|
| 59-Engineers and other professionals, n.e.c. | 49-Nuclear engineers<br>54-Agricultural engineers<br>58-Marine engineers and naval architects<br>59-Engineers, n.e.c | 49-Nuclear engineers<br>54-Agricultural engineers<br>58-Marine engineers and naval architects<br>59-Engineers, n.e.c | 142-Environmental engineers<br>144-Marine engineers<br>151-Nuclear engineers<br>153-Miscellaneous engineers, including agricultural and biomedical | 134-Biomedical and agricultural engineers<br>142-Environmental engineers<br>144-Marine engineers and Naval architects<br>153-Miscellaneous engineers including nuclear engineers | 1340-Biomedical and agricultural engineers<br>1420-Environmental engineers<br>1440-Marine engineers and naval architects<br>1530-Miscellaneous engineers including nuclear engineers |

**Panel B: *Occ1990dd* codes 58 and 59, after editing**

| <i>Occ1990dd</i> code                        | 1980 Census Codes                                                        | 1990 Census Codes                                                        | 2000 Census (5% Sample) Codes                                                                                              | 2005 ACS Codes                                                                                                                      | 2010 ACS Codes                                                                                                                         |
|----------------------------------------------|--------------------------------------------------------------------------|--------------------------------------------------------------------------|----------------------------------------------------------------------------------------------------------------------------|-------------------------------------------------------------------------------------------------------------------------------------|----------------------------------------------------------------------------------------------------------------------------------------|
| 59-Engineers and other professionals, n.e.c. | 49-Nuclear engineers<br>54-Agricultural engineers<br>59-Engineers, n.e.c | 49-Nuclear engineers<br>54-Agricultural engineers<br>59-Engineers, n.e.c | 142-Environmental engineers<br>151-Nuclear engineers<br>153-Miscellaneous engineers, including agricultural and biomedical | 134-Biomedical and agricultural engineers<br>142-Environmental engineers<br>153-Miscellaneous engineers including nuclear engineers | 1340-Biomedical and agricultural engineers<br>1420-Environmental engineers<br>1530-Miscellaneous engineers including nuclear engineers |
| 58-Marine engineers and naval Architects     | 58-Marine engineers and naval architects                                 | 58-Marine engineers and naval architects                                 | 144-Marine engineers                                                                                                       | 144-Marine engineers and naval architects                                                                                           | 1440-Marine engineers and naval architects                                                                                             |

The updated and edited *occ1990dd* codes, descriptions and associated OCC codes are displayed in Table 3.

Table 3: Updated and edited *occ1990dd* occupation system, based on earlier work by Autor and Dorn (2013)

| Occ1990dd code | Occ1990dd code description                               | Census 1980 Codes | Census 1990 Codes         | Census 2000 (5% Sample) Codes                                                                            | ACS 2005 Codes                                                                               | ACS 2010 Codes                                                                                                      |
|----------------|----------------------------------------------------------|-------------------|---------------------------|----------------------------------------------------------------------------------------------------------|----------------------------------------------------------------------------------------------|---------------------------------------------------------------------------------------------------------------------|
| 4              | Chief executives, public administrators, and legislators | 3<br>4            | 3<br>4                    | 1<br>3                                                                                                   | 1                                                                                            | 10                                                                                                                  |
| 7              | Financial managers                                       | 7                 | 7                         | 12                                                                                                       | 12                                                                                           | 120                                                                                                                 |
| 8              | Human resources and labor relations managers             | 8                 | 8                         | 13                                                                                                       | 13                                                                                           | 135<br>136<br>137                                                                                                   |
| 9              | Purchasing managers                                      | 9                 | 9                         | 15                                                                                                       | 15                                                                                           | 150                                                                                                                 |
| 13             | Managers in marketing, advert., PR                       | 13                | 13                        | 4<br>5<br>6                                                                                              | 4<br>5<br>6                                                                                  | 40<br>50<br>60                                                                                                      |
| 14             | Managers in education and related fields                 | 14                | 14                        | 23                                                                                                       | 23                                                                                           | 230                                                                                                                 |
| 15             | Managers of medicine and health occupations              | 15                | 15                        | 35                                                                                                       | 35                                                                                           | 350                                                                                                                 |
| 18             | Managers of properties and real estate                   | 16                | 18                        | 41                                                                                                       | 41                                                                                           | 410                                                                                                                 |
| 19             | Funeral directors                                        | 18                | 19                        | 32                                                                                                       | 32                                                                                           | 4465                                                                                                                |
| 22             | Managers and administrators, n.e.c.                      | 5<br>17<br>19     | 5<br>16<br>17<br>21<br>22 | 2<br>10<br>11<br>14<br>16<br>22<br>30<br>31<br>33<br>34<br>36<br>40<br>42<br>43<br>60<br>72<br>72<br>430 | 2<br>10<br>11<br>14<br>16<br>22<br>30<br>31<br>33<br>34<br>36<br>42<br>43<br>60<br>72<br>430 | 20<br>100<br>110<br>140<br>160<br>220<br>300<br>310<br>330<br>340<br>360<br>420<br>425<br>430<br>600<br>725<br>4300 |
| 23             | Accountants and auditors                                 | 23                | 23                        | 80<br>93                                                                                                 | 80<br>93                                                                                     | 800<br>930                                                                                                          |
| 24             | Insurance underwriters                                   | 24                | 24                        | 86                                                                                                       | 86                                                                                           | 860                                                                                                                 |
| 25             | Other financial specialists                              | 25                | 25                        | 82<br>83<br>84<br>85<br>91<br>94<br>95                                                                   | 82<br>83<br>84<br>85<br>91<br>94<br>95                                                       | 820<br>830<br>840<br>850<br>910<br>940<br>950                                                                       |
| 26             | Management analysts                                      | 26                | 26                        | 71                                                                                                       | 71                                                                                           | 710                                                                                                                 |
| 27             | Personnel, HR, training, and labor rel. specialists      | 27                | 27                        | 62                                                                                                       | 62                                                                                           | 630<br>640<br>650                                                                                                   |
| 28             | Purchasing agents and buyers of farm products            | 28                | 28                        | 51                                                                                                       | 51                                                                                           | 510                                                                                                                 |
| 29             | Buyers, wholesale and retail trade                       | 29                | 29                        | 52                                                                                                       | 52                                                                                           | 520                                                                                                                 |
| 33             | Purchasing agents and buyers, n.e.c.                     | 33                | 33                        | 53                                                                                                       | 53                                                                                           | 530                                                                                                                 |
| 34             | Business and promotion agents                            | 34                | 34                        | 50                                                                                                       | 50                                                                                           | 500                                                                                                                 |
| 35             | Construction inspectors                                  | 35                | 35                        | 666                                                                                                      | 666                                                                                          | 6660                                                                                                                |
| 36             | Inspectors and compliance officers, outside              | 36                | 36                        | 56<br>90                                                                                                 | 56<br>90                                                                                     | 565<br>900                                                                                                          |
| 37             | Management support occupations                           | 37                | 37                        | 73                                                                                                       | 73                                                                                           | 726<br>740                                                                                                          |
| 43             | Architects                                               | 43                | 43                        | 130                                                                                                      | 130                                                                                          | 1300                                                                                                                |
| 44             | Aerospace engineers                                      | 44                | 44                        | 132                                                                                                      | 132                                                                                          | 1320                                                                                                                |
| 45             | Metallurgical and materials engineers                    | 45                | 45                        | 145                                                                                                      | 145                                                                                          | 1450                                                                                                                |
| 47             | Petroleum, mining, and geological engineers              | 46<br>47          | 46<br>47                  | 152                                                                                                      | 152                                                                                          | 1520                                                                                                                |



| Occ1990dd code | Occ1990dd code description                        | Census 1980 Codes | Census 1990 Codes | Census 2000 (5% Sample) Codes | ACS 2005 Codes | ACS 2010 Codes |
|----------------|---------------------------------------------------|-------------------|-------------------|-------------------------------|----------------|----------------|
| 47             | Petroleum, mining, and geological engineers       | 46                | 46                | 152                           | 152            | 1520           |
| 48             | Chemical engineers                                | 47                | 47                |                               |                |                |
| 53             | Civil engineers                                   | 48                | 48                | 135                           | 135            | 1350           |
| 55             | Electrical engineers                              | 53                | 53                | 136                           | 136            | 1360           |
|                |                                                   | 55                | 55                | 140                           | 140            | 1400           |
|                |                                                   |                   |                   | 141                           | 141            | 1410           |
| 56             | Industrial engineers                              | 56                | 56                | 143                           | 143            | 1430           |
| 57             | Mechanical engineers                              | 57                | 57                | 146                           | 146            | 1460           |
| 58             | Marine engineers and naval architects             | 58                | 58                | 144                           | 144            | 1440           |
| 59             | Engineers and other professionals, n.e.c.         | 49                | 49                | 142                           | 134            | 1340           |
|                |                                                   | 54                | 54                | 151                           | 142            | 1420           |
|                |                                                   | 59                | 59                | 153                           | 153            | 1530           |
| 64             | Computer systems analysts and computer scientists | 64                | 64                | 100                           | 100            | 1005           |
|                |                                                   |                   |                   | 102                           | 102            | 1006           |
|                |                                                   |                   |                   | 104                           | 104            | 1007           |
|                |                                                   |                   |                   | 106                           | 106            | 1020           |
|                |                                                   |                   |                   | 110                           | 110            | 1030           |
|                |                                                   |                   |                   | 111                           | 111            | 1050           |
|                |                                                   |                   |                   |                               |                | 1060           |
|                |                                                   |                   |                   |                               |                | 1105           |
|                |                                                   |                   |                   |                               |                | 1106           |
|                |                                                   |                   |                   |                               |                | 1107           |
| 65             | Operations and systems researchers and analysts   | 65                | 65                | 70                            | 70             | 700            |
|                |                                                   |                   |                   | 122                           | 122            | 1220           |
| 66             | Actuaries                                         | 66                | 66                | 120                           | 120            | 1200           |
| 68             | Mathematicians and statisticians                  | 67                | 67                | 124                           | 124            | 1240           |
|                |                                                   | 68                | 68                |                               |                |                |
| 69             | Physicists and astronomers                        | 69                | 69                | 170                           | 170            | 1700           |
| 73             | Chemists                                          | 73                | 73                | 172                           | 172            | 1720           |
| 74             | Atmospheric and space scientists                  | 74                | 74                | 171                           | 171            | 1710           |
| 75             | Geologists                                        | 75                | 75                | 174                           | 174            | 1740           |
| 76             | Physical scientists, n.e.c.                       | 76                | 76                | 176                           | 176            | 1760           |
| 77             | Agricultural and food scientists                  | 77                | 77                | 160                           | 160            | 1600           |
| 78             | Biological scientists                             | 78                | 78                | 161                           | 161            | 1610           |
| 79             | Foresters and conservation scientists             | 79                | 79                | 164                           | 164            | 1640           |
| 83             | Medical scientists                                | 83                | 83                | 165                           | 165            | 1650           |
| 84             | Physicians                                        | 84                | 84                | 306                           | 306            | 3060           |
| 85             | Dentists                                          | 85                | 85                | 301                           | 301            | 3010           |
| 86             | Veterinarians                                     | 86                | 86                | 325                           | 325            | 3250           |
| 87             | Optometrists                                      | 87                | 87                | 304                           | 304            | 3040           |
| 88             | Podiatrists                                       | 88                | 88                | 312                           | 312            | 3120           |
| 89             | Other health and therapy occupations              | 89                | 89                | 300                           | 300            | 3000           |
|                |                                                   |                   |                   | 326                           | 326            | 3260           |
| 95             | Registered nurses                                 | 95                | 95                | 313                           | 313            | 3255           |
|                |                                                   |                   |                   |                               |                | 3256           |
|                |                                                   |                   |                   |                               |                | 3258           |
| 96             | Pharmacists                                       | 96                | 96                | 305                           | 305            | 3050           |
| 97             | Dieticians and nutritionists                      | 97                | 97                | 303                           | 303            | 3030           |
| 98             | Respiratory therapists                            | 98                | 98                | 322                           | 322            | 3220           |
| 99             | Occupational therapists                           | 99                | 99                | 315                           | 315            | 3150           |
| 103            | Physical therapists                               | 103               | 103               | 316                           | 316            | 3160           |
| 104            | Speech therapists                                 | 104               | 104               | 314                           | 314            | 3140           |
|                |                                                   |                   |                   | 323                           | 323            | 3230           |
| 105            | Therapists, n.e.c.                                | 105               | 105               | 320                           | 320            | 3200           |
|                |                                                   |                   |                   | 321                           | 321            | 3210           |
|                |                                                   |                   |                   | 324                           | 324            | 3245           |
| 106            | Physicians' assistants                            | 106               | 106               | 311                           | 311            | 3110           |

| Occ1990dd code | Occ1990dd code description                           | Census 1980 Codes                                                                                                                                                                                              | Census 1990 Codes                                                                                                                                                                                              | Census 2000 (5% Sample) Codes | ACS 2005 Codes | ACS 2010 Codes       |
|----------------|------------------------------------------------------|----------------------------------------------------------------------------------------------------------------------------------------------------------------------------------------------------------------|----------------------------------------------------------------------------------------------------------------------------------------------------------------------------------------------------------------|-------------------------------|----------------|----------------------|
| 154            | Subject instructors, college                         | 113<br>114<br>115<br>116<br>117<br>118<br>119<br>123<br>124<br>125<br>126<br>127<br>128<br>129<br>133<br>134<br>135<br>136<br>137<br>138<br>139<br>143<br>144<br>145<br>146<br>147<br>148<br>149<br>153<br>154 | 113<br>114<br>115<br>116<br>117<br>118<br>119<br>123<br>124<br>125<br>126<br>127<br>128<br>129<br>133<br>134<br>135<br>136<br>137<br>138<br>139<br>143<br>144<br>145<br>146<br>147<br>148<br>149<br>153<br>154 | 220                           | 220            | 2200                 |
| 155            | Kindergarten and earlier school teachers             | 155                                                                                                                                                                                                            | 155                                                                                                                                                                                                            | 230                           | 230            | 2300                 |
| 156            | Primary school teachers                              | 156                                                                                                                                                                                                            | 156                                                                                                                                                                                                            | 231                           | 231            | 2310                 |
| 157            | Secondary school teachers                            | 157                                                                                                                                                                                                            | 157                                                                                                                                                                                                            | 232                           | 232            | 2320                 |
| 158            | Special education teachers                           | 158                                                                                                                                                                                                            | 158                                                                                                                                                                                                            | 233                           | 233            | 2330                 |
| 159            | Teachers, n.e.c.                                     | 159                                                                                                                                                                                                            | 159                                                                                                                                                                                                            | 234<br>255                    | 234<br>255     | 2340<br>2550         |
| 163            | Vocational and educational counselors                | 163                                                                                                                                                                                                            | 163                                                                                                                                                                                                            | 200                           | 200            | 2000                 |
| 164            | Librarians                                           | 164                                                                                                                                                                                                            | 164                                                                                                                                                                                                            | 243                           | 243            | 2430                 |
| 165            | Archivists and curators                              | 165                                                                                                                                                                                                            | 165                                                                                                                                                                                                            | 240                           | 240            | 2400                 |
| 166            | Economists, market and survey researchers            | 166                                                                                                                                                                                                            | 166                                                                                                                                                                                                            | 180<br>181                    | 180<br>181     | 735<br>1800          |
| 167            | Psychologists                                        | 167                                                                                                                                                                                                            | 167                                                                                                                                                                                                            | 182                           | 182            | 1820                 |
| 169            | Social scientists and sociologists, n.e.c.           | 168<br>169                                                                                                                                                                                                     | 168<br>169                                                                                                                                                                                                     | 186                           | 186            | 1860                 |
| 173            | Urban and regional planners                          | 173                                                                                                                                                                                                            | 173                                                                                                                                                                                                            | 184                           | 184            | 1840                 |
| 174            | Social workers                                       | 174                                                                                                                                                                                                            | 174                                                                                                                                                                                                            | 201                           | 201            | 2010                 |
| 175            | Religious workers, n.e.c.                            | 177                                                                                                                                                                                                            | 177                                                                                                                                                                                                            | 205<br>206                    | 205<br>206     | 2050<br>2060         |
| 176            | Clergy                                               | 176                                                                                                                                                                                                            | 176                                                                                                                                                                                                            | 204                           | 204            | 2040                 |
| 177            | Welfare service workers                              | 467                                                                                                                                                                                                            | 465                                                                                                                                                                                                            | 202                           | 202            | 2015<br>2016<br>2025 |
| 178            | Lawyers and judges                                   | 178<br>179                                                                                                                                                                                                     | 178<br>179                                                                                                                                                                                                     | 210<br>211                    | 210            | 2100<br>2105         |
| 183            | Writers and authors                                  | 183                                                                                                                                                                                                            | 183                                                                                                                                                                                                            | 285                           | 285            | 2850                 |
| 184            | Technical writers                                    | 184                                                                                                                                                                                                            | 184                                                                                                                                                                                                            | 284                           | 284            | 2840                 |
| 185            | Designers                                            | 185                                                                                                                                                                                                            | 185                                                                                                                                                                                                            | 263                           | 263            | 2630                 |
| 186            | Musicians and composers                              | 186                                                                                                                                                                                                            | 186                                                                                                                                                                                                            | 275                           | 275            | 2750                 |
| 187            | Actors, directors, and producers                     | 187                                                                                                                                                                                                            | 187                                                                                                                                                                                                            | 270<br>271                    | 270<br>271     | 2700<br>2710         |
| 188            | Painters, sculptors, craft-artists, and print-makers | 188                                                                                                                                                                                                            | 188                                                                                                                                                                                                            | 260                           | 260            | 2600                 |
| 189            | Photographers                                        | 189                                                                                                                                                                                                            | 189                                                                                                                                                                                                            | 291<br>292                    | 291<br>292     | 2910<br>2920         |
| 193            | Dancers                                              | 193                                                                                                                                                                                                            | 193                                                                                                                                                                                                            | 274                           | 274            | 2740                 |
| 194            | Art/entertainment performers and related occs        | 194                                                                                                                                                                                                            | 194                                                                                                                                                                                                            | 276<br>286                    | 276<br>286     | 2760<br>2860         |

| Occ1990dd code | Occ1990dd code description                          | Census 1980 Codes                             | Census 1990 Codes                             | Census 2000 (5% Sample) Codes | ACS 2005 Codes           | ACS 2010 Codes               |
|----------------|-----------------------------------------------------|-----------------------------------------------|-----------------------------------------------|-------------------------------|--------------------------|------------------------------|
| 195            | Editors and reporters                               | 195                                           | 195                                           | 281<br>283                    | 281<br>283               | 2810<br>2830                 |
| 197            | Specialists in marketing, advert., PR               | 197                                           | 197                                           | 282                           | 282                      | 2825                         |
| 198            | Announcers                                          | 198                                           | 198                                           | 280                           | 280                      | 2800                         |
| 199            | Athletes, sports instructors, and officials         | 199                                           | 199                                           | 272                           | 272                      | 2720                         |
| 203            | Clinical laboratory technologies and technicians    | 203                                           | 203                                           | 330                           | 330                      | 3300                         |
| 204            | Dental hygienists                                   | 204                                           | 204                                           | 331                           | 331                      | 3310                         |
| 205            | Health record technologists and technicians         | 205                                           | 205                                           | 351                           | 351                      | 3510                         |
| 206            | Radiologic technologists and technicians            | 206                                           | 206                                           | 332                           | 332                      | 3320                         |
| 207            | Licensed practical nurses                           | 207                                           | 207                                           | 350                           | 350                      | 3500                         |
| 208            | Health technologists and technicians, n.e.c.        | 208                                           | 208                                           | 340<br>341<br>353<br>354      | 340<br>341<br>353<br>354 | 3400<br>3420<br>3535<br>3540 |
| 214            | Engineering and science technicians                 | 213<br>214<br>215<br>216<br>225               | 213<br>214<br>215<br>216<br>225               | 155<br>193                    | 155<br>193               | 1550<br>1930<br>1940         |
| 217            | Drafters                                            | 217                                           | 217                                           | 154                           | 154                      | 1540                         |
| 218            | Surveyors, cartographers, mapping scientists/techs  | 63<br>218<br>867                              | 63<br>218<br>867                              | 131<br>156                    | 131<br>156               | 1310<br>1560                 |
| 223            | Biological technicians                              | 223                                           | 223                                           | 190<br>191                    | 190<br>191               | 1900<br>1910                 |
| 224            | Chemical technicians                                | 224                                           | 224                                           | 192                           | 192                      | 1920                         |
| 226            | Airplane pilots and navigators                      | 226                                           | 226                                           | 903                           | 903                      | 9030                         |
| 227            | Air traffic controllers                             | 227                                           | 227                                           | 904                           | 904                      | 9040                         |
| 228            | Broadcast equipment operators                       | 228                                           | 228                                           | 290                           | 290                      | 2900                         |
| 229            | Computer programmers                                | 229                                           | 229                                           | 101                           | 101                      | 1010                         |
| 233            | Programmers of numerically controlled machine tools | 233<br>714                                    | 233<br>714                                    | 790                           | 790                      | 7900                         |
| 234            | Legal assistants and paralegals                     | 234<br>314                                    | 234<br>314                                    | 214<br>215                    | 214<br>215               | 2145<br>2160                 |
| 235            | Technicians, n.e.c.                                 | 235                                           | 235                                           | 196                           | 196                      | 1950<br>1965                 |
| 243            | Sales supervisors and proprietors                   | 243                                           | 243                                           | 470<br>471                    | 470<br>471               | 4700<br>4710                 |
| 253            | Insurance sales occupations                         | 253                                           | 253                                           | 481                           | 481                      | 4810                         |
| 254            | Real estate sales occupations                       | 254                                           | 254                                           | 81<br>492                     | 81<br>492                | 810<br>4920                  |
| 255            | Financial service sales occupations                 | 255                                           | 255                                           | 482                           | 482                      | 4820                         |
| 256            | Advertising and related sales jobs                  | 256                                           | 256                                           | 480                           | 480                      | 4800                         |
| 258            | Sales engineers                                     | 258                                           | 258                                           | 493                           | 493                      | 4930                         |
| 269            | Parts salesperson                                   | 269                                           | 269                                           | 475                           | 475                      | 4750                         |
| 270            | Sales workers                                       | 263<br>264<br>265<br>266<br>267<br>268<br>274 | 263<br>264<br>265<br>266<br>267<br>268<br>274 | 476                           | 476                      | 4760                         |
| 274            | Sales occupations and sales representatives         | 257<br>259                                    | 257<br>259                                    | 484<br>485<br>494             | 484<br>485<br>494        | 4840<br>4850<br>4940         |
| 275            | Sales counter clerks                                | 275                                           | 275                                           | 474                           | 474                      | 4740                         |
| 276            | Cashiers                                            | 276                                           | 276                                           | 472<br>513                    | 472<br>513               | 4720<br>5130                 |
| 277            | Door-to-door sales, street sales, and news vendors  | 277<br>278                                    | 277<br>278                                    | 495                           | 495                      | 4950                         |
| 283            | Sales demonstrators, promoters, and models          | 283                                           | 283                                           | 490                           | 490                      | 4900                         |
| 285            | Auctioneers and sales support occupations, n.e.c.   | 284<br>285                                    | 284<br>285                                    | 496                           | 496                      | 4965                         |

| Occ1990dd code | Occ1990dd code description                               | Census 1980 Codes               | Census 1990 Codes               | Census 2000 (5% Sample) Codes | ACS 2005 Codes    | ACS 2010 Codes       |
|----------------|----------------------------------------------------------|---------------------------------|---------------------------------|-------------------------------|-------------------|----------------------|
| 303            | Office supervisors                                       | 303<br>304<br>305<br>306<br>307 | 303<br>304<br>305<br>306<br>307 | 500                           | 500               | 5000                 |
| 308            | Computer and peripheral equipment operators              | 308<br>309                      | 308<br>309                      | 580                           | 580               | 5800                 |
| 313            | Secretaries and administrative assistants                | 313                             | 313                             | 570                           | 570               | 5700                 |
| 315            | Typists                                                  | 315                             | 315                             | 582                           | 582               | 5820                 |
| 316            | Interviewers, enumerators, and surveyors                 | 316                             | 316                             | 523<br>531<br>534             | 523<br>531<br>534 | 5230<br>5310<br>5340 |
| 317            | Hotel clerks                                             | 317                             | 317                             | 530                           | 530               | 5300                 |
| 318            | Transportation ticket and reservation agents             | 318                             | 318                             | 483<br>541                    | 483<br>541        | 4830<br>5410         |
| 319            | Receptionists and other information clerks               | 319<br>323                      | 319<br>323                      | 540                           | 540               | 5400                 |
| 326            | Correspondence and order clerks                          | 325<br>326<br>327               | 325<br>326<br>327               | 535                           | 535               | 5350                 |
| 328            | Human resources clerks, excl payroll and timekeeping     | 328                             | 328                             | 536                           | 536               | 5360                 |
| 329            | Library assistants                                       | 329                             | 329                             | 244<br>532                    | 244<br>532        | 2440<br>5320         |
| 335            | File clerks                                              | 335                             | 335                             | 526                           | 526               | 5260                 |
| 336            | Records clerks                                           | 336                             | 336                             | 520<br>542                    | 520<br>542        | 5200<br>5420         |
| 337            | Bookkeepers and accounting and auditing clerks           | 337                             | 337                             | 512                           | 512               | 5120                 |
| 338            | Payroll and timekeeping clerks                           | 338                             | 338                             | 514                           | 514               | 5140                 |
| 344            | Billing clerks and related financial records processing  | 339<br>343<br>344               | 339<br>343<br>344               | 511                           | 511               | 5110                 |
| 347            | Office machine operators, n.e.c.                         | 345<br>347                      | 345<br>347                      | 590                           | 590               | 5900                 |
| 348            | Telephone operators                                      | 348                             | 348                             | 501<br>502                    | 501<br>502        | 5010<br>5020         |
| 349            | Other telecom operators                                  | 349<br>353                      | 353                             | 503                           | 503               | 5030                 |
| 354            | Postal clerks, excluding mail carriers                   | 354                             | 354                             | 554<br>556                    | 554<br>556        | 5540<br>5560         |
| 355            | Mail carriers for postal service                         | 355                             | 355                             | 555                           | 555               | 5550                 |
| 356            | Mail clerks, outside of post office                      | 346<br>356                      | 346<br>356                      | 585                           | 585               | 5850                 |
| 357            | Messengers                                               | 357                             | 357                             | 551                           | 551               | 5510                 |
| 359            | Dispatchers                                              | 359                             | 359                             | 552                           | 552               | 5520                 |
| 364            | Shipping and receiving clerks                            | 364                             | 364                             | 550<br>561                    | 550<br>561        | 5500<br>5610         |
| 365            | Stock and inventory clerks                               | 365<br>374                      | 365<br>374                      | 515<br>562                    | 515<br>562        | 5150<br>5620         |
| 366            | Meter readers                                            | 366                             | 366                             | 553                           | 553               | 5530                 |
| 368            | Weighers, measurers, and checkers                        | 368<br>369                      | 368<br>369                      | 563                           | 563               | 5630                 |
| 373            | Material recording, sched., prod., plan., expediting cl. | 363<br>373                      | 363<br>373                      | 560                           | 560               | 5600                 |
| 375            | Insurance adjusters, examiners, and investigators        | 375                             | 375                             | 54<br>584                     | 54<br>584         | 540<br>5840          |
| 376            | Customer service reps, invest., adjusters, excl. insur.  | 376                             | 376                             | 524<br>533                    | 524<br>533        | 5240<br>5330         |
| 377            | Eligibility clerks for government prog., social welfare  | 377                             | 377                             | 525                           | 525               | 5250                 |
| 378            | Bill and account collectors                              | 378                             | 378                             | 510                           | 510               | 5100                 |
| 379            | General office clerks                                    | 379                             | 379                             | 586                           | 586               | 5860                 |
| 383            | Bank tellers                                             | 383                             | 383                             | 516                           | 516               | 5160                 |
| 384            | Proofreaders                                             | 384                             | 384                             | 591                           | 591               | 5910                 |

| Occ1990dd code | Occ1990dd code description                                | Census 1980 Codes | Census 1990 Codes | Census 2000 (5% Sample) Codes | ACS 2005 Codes | ACS 2010 Codes |
|----------------|-----------------------------------------------------------|-------------------|-------------------|-------------------------------|----------------|----------------|
| 385            | Data entry keyers                                         | 385               | 385               | 581                           | 581            | 5810           |
| 386            | Statistical clerks                                        | 386               | 386               | 592                           | 592            | 5920           |
| 387            | Teacher's aides                                           | 387               | 387               | 254                           | 254            | 2540           |
| 389            | Administrative support jobs, n.e.c.                       | 389               | 389               | 522                           | 522            | 5165           |
|                |                                                           |                   |                   | 583                           | 593            | 5220           |
|                |                                                           |                   |                   | 593                           |                | 5940           |
| 405            | Housekeepers, maids, butlers, and cleaners                | 405               | 405               | 423                           | 423            | 4230           |
|                |                                                           | 407               | 407               |                               |                |                |
|                |                                                           | 449               | 449               |                               |                |                |
| 408            | Laundry and dry cleaning workers                          | 748               | 748               | 830                           | 830            | 8300           |
| 413            | Supervisors, firefighting and fire prevention occupations | 413               | 413               | 372                           | 372            | 3720           |
| 414            | Supervisors, police and detectives                        | 6                 | 6                 | 371                           | 371            | 3710           |
|                |                                                           | 414               | 414               |                               |                |                |
| 415            | Supervisors of guards                                     | 415               | 415               | 373                           | 373            | 3730           |
| 417            | Fire fighting, inspection, and prevention occupations     | 416               | 416               | 374                           | 374            | 3740           |
|                |                                                           | 417               | 417               | 375                           | 375            | 3750           |
| 418            | Police and detectives, public service                     | 418               | 418               | 370                           | 370            | 3700           |
|                |                                                           |                   |                   | 382                           | 382            | 3820           |
|                |                                                           |                   |                   | 385                           | 385            | 3850           |
| 423            | Sheriffs, bailiffs, correctional institution officers     | 423               | 423               | 380                           | 380            | 3800           |
|                |                                                           | 424               | 424               | 384                           | 384            | 3840           |
| 425            | Crossing guards                                           | 425               | 425               | 394                           | 394            | 3940           |
| 426            | Guards and police, except public service                  | 426               | 426               | 391                           | 391            | 3910           |
|                |                                                           |                   |                   | 392                           | 392            | 3930           |
| 427            | Protective service, n.e.c.                                | 427               | 427               | 390                           | 390            | 3900           |
|                |                                                           |                   |                   | 395                           | 395            | 3955           |
| 433            | Supervisors of food preparation and service               | 433               | 433               | 401                           | 401            | 4010           |
| 434            | Bartenders                                                | 434               | 434               | 404                           | 404            | 4040           |
| 435            | Waiters and waitresses                                    | 435               | 435               | 411                           | 411            | 4110           |
| 436            | Cooks                                                     | 404               | 404               | 400                           | 400            | 4000           |
|                |                                                           | 436               | 436               | 402                           | 402            | 4020           |
|                |                                                           | 437               |                   |                               |                |                |
| 439            | Food preparation workers                                  | 439               | 439               | 403                           | 403            | 4030           |
| 444            | Miscellaneous food preparation and service workers        | 438               | 438               | 405                           | 405            | 4050           |
|                |                                                           | 443               | 443               | 406                           | 406            | 4060           |
|                |                                                           | 444               | 444               | 412                           | 412            | 4120           |
|                |                                                           |                   |                   | 413                           | 413            | 4130           |
|                |                                                           |                   |                   | 414                           | 414            | 4140           |
|                |                                                           |                   |                   | 415                           | 415            | 4150           |
| 445            | Dental assistants                                         | 445               | 445               | 364                           | 364            | 3640           |
| 447            | Health and nursing aides                                  | 446               | 446               | 360                           | 360            | 3600           |
|                |                                                           | 447               | 447               | 361                           | 361            | 3610           |
|                |                                                           |                   |                   | 362                           | 362            | 3620           |
|                |                                                           |                   |                   | 365                           | 365            | 3645           |
|                |                                                           |                   |                   | 461                           | 461            | 3646           |
|                |                                                           |                   |                   |                               |                | 3647           |
|                |                                                           |                   |                   |                               |                | 3648           |
|                |                                                           |                   |                   |                               |                | 3649           |
|                |                                                           |                   |                   |                               |                | 3655           |
|                |                                                           |                   |                   |                               |                | 4610           |
| 448            | Supervisors of cleaning and building service              | 448               | 448               | 420                           | 420            | 4200           |
| 450            | Superv. of landscaping, lawn service, groundskeeping      | 485               | 485               | 421                           | 421            | 4210           |
| 451            | Gardeners and groundskeepers                              | 474               | 474               | 425                           | 425            | 4250           |
|                |                                                           | 486               | 486               |                               |                |                |
| 453            | Janitors                                                  | 453               | 453               | 422                           | 422            | 4220           |
| 455            | Pest control occupations                                  | 455               | 455               | 424                           | 424            | 4240           |
| 457            | Barbers                                                   | 457               | 457               | 450                           | 450            | 4500           |
| 458            | Hairdressers and cosmetologists                           | 458               | 458               | 451                           | 451            | 4510           |
|                |                                                           |                   |                   | 452                           | 452            | 4520           |
| 459            | Recreation facility attendants                            | 459               | 459               | 440                           | 440            | 4400           |
|                |                                                           |                   |                   | 443                           | 443            | 4430           |

| Occ1990dd code | Occ1990dd code description                                               | Census 1980 Codes | Census 1990 Codes | Census 2000 (5% Sample) Codes | ACS 2005 Codes | ACS 2010 Codes |
|----------------|--------------------------------------------------------------------------|-------------------|-------------------|-------------------------------|----------------|----------------|
| 461            | Guides                                                                   | 463               | 461               | 454                           | 454            | 4540           |
| 462            | Ushers                                                                   | 464               | 462               | 442                           | 442            | 4420           |
| 464            | Baggage porters, bellhops and concierges                                 | 466               | 464               | 453                           | 453            | 4530           |
| 466            | Recreation and fitness workers                                           | 175               | 175               | 462                           | 462            | 4620           |
| 467            | Motion picture projectionists                                            | 773               | 773               | 441                           | 441            | 4410           |
| 468            | Childcareworkers                                                         | 406               | 406               | 460                           | 460            | 4600           |
|                |                                                                          | 468               | 466               | 464                           | 464            | 4640           |
|                |                                                                          |                   | 467               |                               |                |                |
|                |                                                                          |                   | 468               |                               |                |                |
| 469            | Personal service occupations, n.e.c                                      | 469               | 469               | 363                           | 363            | 3630           |
|                |                                                                          |                   |                   | 446                           | 446            | 4460           |
|                |                                                                          |                   |                   | 465                           | 465            | 4650           |
| 470            | Supervisors of personal service jobs, n.e.c                              | 456               | 456               | 432                           | 432            | 4320           |
| 471            | Public transportation attendants                                         | 465               | 463               | 455                           | 455            | 9050           |
|                |                                                                          |                   |                   |                               |                | 9415           |
| 472            | Animal caretakers, except farm                                           | 487               | 487               | 435                           | 435            | 4350           |
| 473            | Farmers, ranchers, and other agricultural managers                       | 473               | 473               | 20                            | 20             | 205            |
|                |                                                                          | 475               | 475               | 21                            | 21             |                |
|                |                                                                          | 476               | 476               |                               |                |                |
| 479            | Farm workers, incl. nursery farming, and marine life cultivation workers | 479               | 479               | 434                           | 434            | 4340           |
|                |                                                                          | 483               | 483               | 605                           | 605            | 6050           |
|                |                                                                          | 484               | 484               |                               |                |                |
| 488            | Graders and sorters of agricultural products                             | 488               | 488               | 604                           | 604            | 6040           |
| 489            | Inspectors of agricultural products                                      | 489               | 489               | 601                           | 601            | 6010           |
| 494            | Supervisors, forestry and logging workers                                | 477               | 477               | 600                           | 600            | 6005           |
|                |                                                                          | 494               | 494               |                               |                |                |
| 496            | Timber, logging, and forestry workers                                    | 495               | 495               | 612                           | 612            | 6120           |
|                |                                                                          | 496               | 496               | 613                           | 613            | 6130           |
| 498            | Fishing and hunting workers                                              | 497               | 497               | 610                           | 610            | 6100           |
|                |                                                                          | 498               | 498               |                               |                |                |
|                |                                                                          | 499               | 499               |                               |                |                |
| 503            | Supervisors of mechanics and repairers                                   | 503               | 503               | 700                           | 700            | 7000           |
| 505            | Automobile mechanics and repairers                                       | 505               | 505               | 720                           | 720            | 7200           |
|                |                                                                          | 506               | 506               |                               |                |                |
| 507            | Bus, truck, and stationary engine mechanics                              | 507               | 507               | 721                           | 721            | 7210           |
| 508            | Aircraft mechanics                                                       | 508               | 508               | 714                           | 714            | 7140           |
|                |                                                                          | 515               | 515               |                               |                |                |
| 509            | Small engine repairers                                                   | 509               | 509               | 724                           | 724            | 7240           |
| 514            | Auto body repairers                                                      | 514               | 514               | 715                           | 715            | 7150           |
|                |                                                                          |                   |                   | 716                           | 716            | 7160           |
| 516            | Heavy equipment and farm equipment mechanics                             | 516               | 516               | 722                           | 722            | 7220           |
|                |                                                                          | 517               | 517               |                               |                |                |
| 518            | Industrial machinery repairers                                           | 518               | 518               | 733                           | 733            | 7330           |
| 519            | Machinery maintenance occupations                                        | 519               | 519               | 735                           | 735            | 7350           |
| 523            | Repairers of industrial electrical equipment                             | 523               | 523               | 710                           | 710            | 7100           |
|                |                                                                          |                   |                   | 712                           | 712            | 7120           |
| 525            | Repairers of data processing equipment                                   | 525               | 525               | 701                           | 701            | 7010           |
|                |                                                                          | 538               | 538               |                               |                |                |
| 526            | Repairers of household appliances and power tools                        | 526               | 526               | 732                           | 732            | 7320           |
| 527            | Telecom and line installers and repairers                                | 527               | 527               | 702                           | 702            | 7020           |
|                |                                                                          | 529               | 529               | 742                           | 742            | 7420           |
| 533            | Repairers of electrical equipment, n.e.c.                                | 533               | 533               | 703                           | 703            | 7030           |
|                |                                                                          |                   |                   | 704                           | 704            | 7040           |
|                |                                                                          |                   |                   | 711                           | 711            | 7110           |
| 534            | Heating, air conditioning, and refrigeration mechanics                   | 534               | 534               | 731                           | 731            | 7315           |
| 535            | Precision instrument and equipment repairers                             | 535               | 535               | 743                           | 743            | 7430           |
| 536            | Locksmiths and safe repairers                                            | 536               | 536               | 754                           | 754            | 7540           |
| 539            | Repairers of mechanical controls and valves                              | 539               | 539               | 730                           | 730            | 7300           |
| 543            | Elevator installers and repairers                                        | 543               | 543               | 670                           | 670            | 6700           |
| 544            | Millwrights                                                              | 544               | 544               | 736                           | 736            | 7360           |
| 549            | Mechanics and repairers, n.e.c.                                          | 547               | 547               | 734                           | 734            | 7340           |
|                |                                                                          | 549               | 549               | 751                           | 751            | 7510           |
|                |                                                                          | 864               |                   | 755                           | 755            | 7550           |
|                |                                                                          |                   |                   | 756                           | 756            | 7560           |
|                |                                                                          |                   |                   | 762                           | 762            | 7630           |

| Occ1990dd code | Occ1990dd code description                          | Census 1980 Codes                             | Census 1990 Codes                             | Census 2000 (5% Sample) Codes | ACS 2005 Codes    | ACS 2010 Codes       |
|----------------|-----------------------------------------------------|-----------------------------------------------|-----------------------------------------------|-------------------------------|-------------------|----------------------|
| 558            | Supervisors of construction work                    | 553<br>554<br>555<br>556<br>557<br>558<br>613 | 553<br>554<br>555<br>556<br>557<br>558<br>613 | 620                           | 620               | 6200                 |
| 563            | Masons, tilers, and carpet installers               | 563<br>564<br>565<br>566                      | 563<br>564<br>565<br>566                      | 622<br>624                    | 622<br>624        | 6220<br>6240         |
| 567            | Carpenters                                          | 567<br>569                                    | 567<br>569                                    | 623                           | 623               | 6230                 |
| 573            | Drywall installers                                  | 573                                           | 573                                           | 633                           | 633               | 6330                 |
| 575            | Electricians                                        | 575<br>576                                    | 575<br>576                                    | 635<br>713                    | 635<br>713        | 6355<br>7130         |
| 577            | Electric power installers and repairers             | 577                                           | 577                                           | 741                           | 741               | 7410                 |
| 579            | Painters, construction and maintenance              | 579                                           | 579                                           | 642                           | 642               | 6420                 |
| 583            | Paperhangers                                        | 583                                           | 583                                           | 643                           | 643               | 6430                 |
| 584            | Plasterers                                          | 584                                           | 584                                           | 646                           | 646               | 6460                 |
| 585            | Plumbers, pipe fitters, and steamfitters            | 585<br>587                                    | 585<br>587                                    | 644                           | 644               | 6440                 |
| 588            | Concrete and cement workers                         | 588                                           | 588                                           | 625                           | 625               | 6250                 |
| 589            | Glaziers                                            | 589                                           | 589                                           | 636                           | 636               | 6360                 |
| 593            | Insulation workers                                  | 593                                           | 593                                           | 640<br>672                    | 640<br>672        | 6400<br>6720         |
| 594            | Paving, surfacing, and tamping equipment operators  | 594                                           | 594                                           | 630                           | 630               | 6300                 |
| 595            | Roofers                                             | 595                                           | 595                                           | 651                           | 651               | 6515                 |
| 597            | Structural metal workers                            | 597                                           | 597                                           | 653<br>774                    | 650<br>653<br>774 | 6500<br>6530<br>7740 |
| 598            | Drillers of earth                                   | 598                                           | 598                                           | 682                           | 682               | 6820                 |
| 599            | Misc. construction and related occupations          | 599                                           | 599                                           | 671<br>675<br>676             | 671<br>676        | 6710<br>6765         |
| 614            | Drillers of oil wells                               | 614                                           | 614                                           | 680                           | 680               | 6800                 |
| 615            | Explosives workers                                  | 615                                           | 615                                           | 683                           | 683               | 6830                 |
| 616            | Miners                                              | 616                                           | 616                                           | 684                           | 684               | 6840                 |
| 617            | Other mining occupations                            | 617                                           | 617                                           | 694<br>868                    | 694               | 6940                 |
| 628            | Production supervisors or foremen                   | 633<br>863                                    | 628                                           | 770                           | 770               | 7700                 |
| 634            | Tool and die makers and die setters                 | 634<br>635                                    | 634                                           | 813                           | 813               | 8130                 |
| 637            | Machinists                                          | 637<br>639                                    | 637                                           | 803                           | 803               | 8030                 |
| 643            | Boilermakers                                        | 643                                           | 643                                           | 621                           | 621               | 6210                 |
| 644            | Precision grinders and fitters                      | 644                                           | 644                                           | 821                           | 821               | 8210                 |
| 645            | Patternmakers and model makers, metal and plastic   | 645<br>676                                    | 645                                           | 806                           | 806               | 8060                 |
| 647            | Jewelers and precious stone and metal workers       | 647                                           | 647                                           | 875                           | 875               | 8750                 |
| 649            | Engravers                                           | 649<br>793                                    | 649                                           | 891                           | 891               | 8910                 |
| 653            | Sheet metal workers                                 | 596<br>653<br>654                             | 596                                           | 652                           | 652               | 6520                 |
| 657            | Cabinetmakers and bench carpeters                   | 657                                           | 657                                           | 850                           | 850               | 8500                 |
| 658            | Furniture and wood finishers                        | 658                                           | 658                                           | 851                           | 851               | 8510                 |
| 666            | Tailors, dressmakers, and sewers                    | 666<br>667                                    | 666                                           | 835                           | 835               | 8350                 |
| 668            | Upholsterers                                        | 668                                           | 668                                           | 845                           | 845               | 8450                 |
| 669            | Shoe and leather workers and repairers              | 669                                           | 669                                           | 833                           | 833               | 8330                 |
| 675            | Hand molders, shapers, and casters, except jewelers | 675<br>787                                    | 675                                           | 892                           | 892               | 8920                 |

| Occ1990dd code | Occ1990dd code description                              | Census 1980 Codes | Census 1990 Codes | Census 2000 (5% Sample) Codes | ACS 2005 Codes | ACS 2010 Codes |
|----------------|---------------------------------------------------------|-------------------|-------------------|-------------------------------|----------------|----------------|
| 677            | Optical goods workers                                   | 677               | 677               | 352                           | 352            | 3520           |
| 678            | Dental laboratory and medical appliance technicians     | 678               | 678               | 876                           | 876            | 8760           |
| 684            | Miscellaneous precision workers, n.e.c.                 | 646               | 646               | 816                           | 822            | 8220           |
|                |                                                         | 684               | 684               | 822                           |                |                |
|                |                                                         | 705               | 705               |                               |                |                |
|                |                                                         | 715               | 715               |                               |                |                |
|                |                                                         | 717               | 717               |                               |                |                |
| 686            | Butchers and meat cutters                               | 686               | 686               | 781                           | 781            | 7810           |
| 687            | Bakers                                                  | 687               | 687               | 780                           | 780            | 7800           |
| 688            | Batch food makers                                       | 688               | 688               | 784                           | 784            | 7840           |
| 694            | Water and sewage treatment plant operators              | 694               | 694               | 862                           | 862            | 8620           |
| 695            | Power plant operators                                   | 695               | 695               | 860                           | 860            | 8600           |
| 696            | Plant and system operators, stationary engineers        | 696               | 696               | 861                           | 861            | 8610           |
| 699            | Other plant and system operators                        | 699               | 699               | 863                           | 863            | 8630           |
| 703            | Lathe and turning machine operatives                    | 703               | 703               | 801                           | 801            | 8010           |
|                |                                                         | 704               | 704               |                               |                |                |
| 706            | Punching and stamping press operatives                  | 706               | 706               | 795                           | 795            | 7950           |
| 707            | Rollers, roll hands, and finishers of metal             | 707               | 707               | 794                           | 794            | 7940           |
| 708            | Drilling and boring machine operators                   | 708               | 708               | 796                           | 796            | 7960           |
| 709            | Grinding, abrading, buffing, and polishing workers      | 655               | 655               | 800                           | 800            | 8000           |
|                |                                                         | 709               | 709               |                               |                |                |
| 713            | Forge and hammer operators                              | 713               | 713               | 793                           | 793            | 7930           |
| 719            | Molders and casting machine operators                   | 719               | 719               | 810                           | 810            | 8100           |
| 723            | Metal platers                                           | 723               | 723               | 820                           | 820            | 8200           |
| 724            | Heat treating equipment operators                       | 724               | 724               | 815                           | 815            | 8150           |
| 727            | Sawing machine operators and sawyers                    | 727               | 727               | 853                           | 853            | 8530           |
| 729            | Nail, tacking, shaping and joining mach ops (wood)      | 726               | 726               | 854                           | 854            | 8540           |
|                |                                                         | 728               | 728               |                               |                |                |
|                |                                                         | 729               | 729               |                               |                |                |
| 733            | Misc. woodworking machine operators                     | 656               | 656               | 855                           | 855            | 8550           |
|                |                                                         | 659               | 659               |                               |                |                |
|                |                                                         | 733               | 733               |                               |                |                |
| 734            | Bookbinders and printing machine operators, n.e.c.      | 679               | 679               | 823                           | 823            | 8255           |
|                |                                                         | 734               | 734               | 824                           | 824            | 8256           |
|                |                                                         | 737               | 737               | 826                           | 826            |                |
| 736            | Typesetters and compositors                             | 735               | 735               | 825                           | 825            | 8250           |
|                |                                                         | 736               | 736               |                               |                |                |
| 738            | Winding and twisting textile and apparel operatives     | 738               | 738               | 842                           | 842            | 8420           |
| 739            | Knitters, loopers, and toppers textile operatives       | 739               | 739               | 841                           | 841            | 8410           |
| 743            | Textile cutting and dyeing machine operators            | 743               | 743               | 836                           | 840            | 8400           |
|                |                                                         |                   |                   | 840                           |                |                |
| 744            | Textile sewing machine operators                        | 744               | 744               | 832                           | 832            | 8320           |
| 745            | Shoemaking machine operators                            | 745               | 745               | 834                           | 834            | 8340           |
| 747            | Clothing pressing machine operators                     | 403               | 403               | 831                           | 831            | 8310           |
|                |                                                         | 747               | 747               |                               |                |                |
| 749            | Miscellaneous textile machine operators                 | 673               | 674               | 846                           | 846            | 8460           |
|                |                                                         | 674               | 749               |                               |                |                |
|                |                                                         | 749               |                   |                               |                |                |
| 753            | Cementing and gluing machine operators                  | 753               | 753               | 885                           | 885            | 8850           |
| 754            | Packers, fillers, and wrappers                          | 754               | 754               | 880                           | 880            | 8800           |
| 755            | Extruding and forming machine operators                 | 755               | 755               | 792                           | 792            | 7920           |
|                |                                                         | 758               | 758               | 872                           | 872            | 8720           |
| 756            | Mixing and blending machine operators                   | 725               | 725               | 865                           | 865            | 8650           |
|                |                                                         | 756               | 756               |                               |                |                |
|                |                                                         | 768               | 768               |                               |                |                |
| 757            | Separating, filtering, and clarifying machine operators | 757               | 757               | 864                           | 864            | 8640           |
| 763            | Food roasting and baking machine operators              | 763               | 763               | 783                           | 783            | 7830           |
| 764            | Washing, cleaning, and pickling machine operators       | 764               | 764               | 886                           | 886            | 8860           |



| Occ1990dd code | Occ1990dd code description                                 | Census 1980 Codes | Census 1990 Codes | Census 2000 (5% Sample) Codes | ACS 2005 Codes | ACS 2010 Codes |
|----------------|------------------------------------------------------------|-------------------|-------------------|-------------------------------|----------------|----------------|
| 765            | Paper folding machine operators                            | 765               | 765               | 893                           | 893            | 8930           |
| 766            | Furnance, kiln, and oven operators, apart from food        | 766               | 766               | 804                           | 804            | 8040           |
|                |                                                            |                   |                   | 873                           | 873            | 8730           |
| 769            | Slicing and cutting machine operators                      | 769               | 769               | 871                           | 871            | 8710           |
|                |                                                            | 786               | 786               |                               |                |                |
| 774            | Photographic process machine operators                     | 774               | 774               | 883                           | 883            | 8830           |
| 779            | Machine operators, n.e.c.                                  | 777               | 777               | 785                           | 785            | 7850           |
|                |                                                            | 779               | 779               | 894                           | 894            | 7855           |
|                |                                                            | 794               | 795               | 896                           | 896            | 8940           |
|                |                                                            | 795               |                   |                               |                | 8965           |
| 783            | Welders, solderers, and metal cutters                      | 783               | 783               | 814                           | 814            | 8140           |
|                |                                                            | 784               | 784               |                               |                |                |
| 785            | Assemblers of electrical equipment                         | 636               | 636               | 771                           | 771            | 7710           |
|                |                                                            | 683               | 683               | 772                           | 772            | 7720           |
|                |                                                            | 693               | 693               | 773                           | 773            | 7730           |
|                |                                                            | 785               | 785               | 775                           | 775            | 7750           |
| 789            | Painting and decoration occupations                        | 759               | 759               | 881                           | 881            | 8810           |
|                |                                                            | 789               | 789               |                               |                |                |
| 799            | Production checkers, graders, and sorters in manufacturing | 689               | 689               | 874                           | 874            | 3945           |
|                |                                                            | 796               | 796               | 941                           | 941            | 8740           |
|                |                                                            | 797               | 797               |                               |                | 9410           |
|                |                                                            | 798               | 798               |                               |                |                |
|                |                                                            | 799               | 799               |                               |                |                |
| 803            | Supervisors of motor vehicle transportation                | 803               | 803               | 900                           | 900            | 9000           |
|                |                                                            | 843               | 843               |                               |                |                |
|                |                                                            |                   | 864               |                               |                |                |
| 804            | Driver/sales workers and truck Drivers                     | 804               | 804               | 913                           | 913            | 9130           |
|                |                                                            | 805               | 806               |                               |                |                |
|                |                                                            | 806               |                   |                               |                |                |
| 808            | Bus drivers                                                | 808               | 808               | 912                           | 912            | 9120           |
| 809            | Taxi drivers and chauffeurs                                | 809               | 809               | 914                           | 914            | 9140           |
| 813            | Parking lot attendants                                     | 813               | 813               | 935                           | 935            | 9350           |
| 814            | Motor transportation occupations, n.e.c.                   | 814               | 814               | 915                           | 911            | 9110           |
|                |                                                            |                   |                   |                               | 915            | 9150           |
| 823            | Railroad conductors and yardmasters                        | 823               | 823               | 924                           | 924            | 9240           |
| 824            | Locomotive operators: engineers and firemen                | 824               | 824               | 920                           | 920            | 9200           |
|                |                                                            | 826               | 826               | 926                           | 926            | 9260           |
| 825            | Railroad brake, coupler, and switch operators              | 825               | 825               | 923                           | 923            | 9230           |
| 828            | Ship and boat captains and operators                       | 828               | 828               | 931                           | 931            | 9310           |
| 829            | Sailors and deckhands, ship/marine engineers               | 829               | 829               | 930                           | 930            | 9300           |
|                |                                                            | 833               | 833               | 933                           |                |                |
| 834            | Miscellaneous transportation occupations                   | 834               | 834               | 942                           | 942            | 9420           |
| 844            | Operating engineers of construction equipment              | 844               | 844               | 632                           | 632            | 6320           |
|                |                                                            | 855               | 855               |                               |                |                |
| 848            | Hoist and winch operators                                  | 848               | 848               | 956                           | 956            | 9560           |
| 849            | Crane and tower operators                                  | 845               | 845               | 951                           | 951            | 9510           |
|                |                                                            | 849               | 849               |                               |                |                |
| 853            | Excavating and loading machine operators                   | 853               | 853               | 952                           | 952            | 9520           |
| 856            | Industrial truck and tractor operators                     | 856               | 856               | 960                           | 960            | 9600           |
| 859            | Misc. material moving equipment operators                  | 454               | 454               | 965                           | 965            | 9650           |
|                |                                                            | 859               | 859               | 975                           | 975            | 9750           |
| 865            | Helpers, constructions                                     | 865               | 865               | 761                           | 761            | 7610           |
| 866            | Helpers, surveyors                                         | 866               | 866               | 660                           | 660            | 6600           |
| 869            | Construction laborers                                      | 869               | 869               | 626                           | 626            | 6260           |
|                |                                                            |                   |                   | 673                           | 673            | 6730           |
| 873            | Production helpers                                         | 873               | 874               | 895                           | 895            | 8950           |
|                |                                                            | 874               |                   |                               |                |                |
| 875            | Garbage and recyclable material collectors                 | 875               | 875               | 972                           | 972            | 9720           |
| 878            | Machine feeders and offbearers                             | 878               | 878               | 963                           | 963            | 9630           |
| 885            | Garage and service station related occupations             | 885               | 885               | 726                           | 726            | 7260           |
|                |                                                            |                   |                   | 936                           | 936            | 9360           |
| 887            | Vehicle washers and equipment cleaners                     | 887               | 887               | 961                           | 961            | 9610           |
| 888            | Packers and packagers by hand                              | 888               | 888               | 964                           | 964            | 9640           |
| 889            | Laborers, freight, stock, and material handlers, n.e.c.    | 876               | 876               | 674                           | 674            | 6740           |
|                |                                                            | 877               | 877               | 962                           | 962            | 9620           |
|                |                                                            | 883               | 883               |                               |                |                |
|                |                                                            | 889               | 889               |                               |                |                |

## References

- Autor, D. and Dorn, D. (2013). The growth of low-skill service jobs and the polarization of the us labor market. *The American Economic Review*, 103(5):1553–1597.
- Scopp, T. S. (2003). *The relationship between the 1990 census and census 2000 industry and occupation classification systems*. US Census Bureau Washington, DC.

# Model Appendix

February 2017

## 1 Set Up

### 1.1 Production Function

Consider a competitive market consisting of a single firm employing two workers.<sup>1</sup> The workers perform a continuum of tasks indexed over the unit interval,  $y(i)$  with  $i \in [0, 1]$ , which are combined to produce a final good  $Y$ . The production function for the final good takes a Cobb-Douglas form:

$$Y = \exp\left[\int_0^1 \ln y(i) di\right]. \quad (1)$$

The production function for task  $i$  produced by worker  $j$  takes the form:

$$y_j(i) = A_j \alpha_j(i) l_j(i), \quad (2)$$

where  $A_j$  is a worker-specific productivity factor,  $\alpha_j(i)$  is a worker- and task-specific productivity factor, and  $l_j(i)$  is the quantity of labor devoted by worker  $j$  to task  $i$ .

For simplicity, assume that each worker supplies one unit of labor inelastically to the market:

$$\int_0^1 l_j(i) di = L_j = 1. \quad (3)$$

This model can therefore be interpreted as describing two *types* of workers, with each type having a unit mass.

### 1.2 Comparative Advantage Schedule

Define:

$$\gamma(i) \equiv \frac{A_1 \alpha_1(i)}{A_2 \alpha_2(i)} \quad (4)$$

to be the comparative advantage of worker 1 relative to worker 2 in task  $i$ . Assume that:

$$\gamma'(i) < 0, \quad (5)$$

---

<sup>1</sup>This model closely follows Dornbusch, Fischer and Samuelson (1977) and Autor and Acemoglu (2011).

so that tasks are indexed in order of decreasing comparative advantage for worker 1 ( $\frac{\alpha_1(0)}{\alpha_2(0)} > \dots > \frac{\alpha_1(i)}{\alpha_2(i)} > \dots > \frac{\alpha_1(1)}{\alpha_2(1)}$ ). Furthermore, assume that the comparative advantage schedule takes the form:

$$\gamma(i) = \bar{A} \exp(\theta(1 - 2i)), \quad (6)$$

where  $\bar{A} = A_1/A_2$  and  $\theta \geq 0$ . Thus  $\theta$  indicates the steepness of the comparative schedule. A higher  $\theta$  means that worker 1 has a stronger comparative advantage relative to worker 2 in low- $i$  tasks and worker 2 has a stronger comparative advantage relative to worker 1 in high- $i$  tasks. When  $\theta = 0$ , worker  $j$ 's productivity reduces to  $A_j$  for all tasks, and there is no comparative advantage - only absolute advantage.

### 1.3 Productivity Distribution

The functional form for  $\gamma(i)$  in 6 is consistent with the notion that a worker's productivity in a given task is drawn from a log-normal distribution defined by parameters that are increasing functions of  $A_j$  and  $\theta$ . Specifically, suppose that for worker  $j$ , productivity in task  $t$  is a random variable  $a_j(t)$  with a log-normal distribution with a worker-specific mean but equal variance across workers:

$$a_j(t) \sim \ln \mathcal{N}(\mu_j, \sigma^2). \quad (7)$$

Imagine worker 1 and worker 2 making simultaneous, independent draws from their worker specific distributions for an infinite number of tasks.

Define  $G(t) \equiv a_1(t)/a_2(t)$  to be the ratio of the productivity of worker 1 relative to the productivity of worker 2 in task  $t$ . Then  $\ln G(t) = \ln a_1(t) - \ln a_2(t)$ , so  $G(t)$  also has a log normal distribution:

$$G(t) \sim \ln \mathcal{N}(\mu_G, \sigma_G^2), \quad (8)$$

where  $\mu_G = \mu_1 - \mu_2$  and  $\sigma_G^2 = 2\sigma^2$ . Since the draws of  $a_1(t)$  and  $a_2(t)$  - and therefore of  $G(t)$  - are independent and identically distributed, I omit  $t$  from here on.

The task index  $i$  indexes tasks in terms of their value of  $G$  in descending order, after productivity draws are realized for each worker. Specifically, define  $F_G(\cdot)$  and  $F_G^{-1}(\cdot)$  to be the cumulative distribution function and quantile function of  $G$ , respectively. Note that the log-normal distribution of  $G$  implies:

$$\begin{aligned} F_G(a) &= \frac{1}{2} \left[ 1 + \operatorname{erf} \left( \frac{\ln a - \mu_G}{\sqrt{2}\sigma_G} \right) \right] \\ F_G^{-1}(q) &= \exp[\mu_G + \sqrt{2}\sigma_G \operatorname{erf}^{-1}(2q - 1)], \end{aligned} \quad (9)$$

where  $\operatorname{erf}(\cdot)$  is the error function, defined as:

$$\operatorname{erf}(x) = \frac{2}{\sqrt{\pi}} \int_0^x \exp(-t^2) dt. \quad (10)$$

Furthermore, define:

$$\begin{aligned} \tilde{\gamma}(i) &\equiv F_G^{-1}(1 - i) \\ &= \exp(\mu_G + \sqrt{2}(\sqrt{2}\sigma) \operatorname{erf}^{-1}(1 - 2i)) \\ &= \frac{\exp(\mu_1)}{\exp(\mu_2)} \exp(2\sigma \operatorname{erf}^{-1}(1 - 2i)). \end{aligned} \quad (11)$$

Thus  $\tilde{\gamma}(i)$  is the value of  $G$  such that  $i$  percent of the distribution of the ratio of the productivity of worker 1 to worker 2 is above that point, assuming that  $G$  is distributed log-normally.

It is clear that  $\tilde{\gamma}(i)$  is roughly comparable to  $\gamma(i)$ , with  $A_1 \approx \exp(\mu_1)$ ,  $A_2 \approx \exp(\mu_2)$ ,  $\bar{A} \approx \exp(\mu_1 - \mu_2)$ , and  $\theta \approx 2\sigma$ . In addition,  $\text{erf}^{-1}(\cdot)$  is a monotonically increasing function. Thus I can argue that all the qualitative results for  $\theta$  hold for the variance of the productivity distribution, while the results for  $A_1$  and  $A_2$  hold for the mean of the productivity distribution for worker 1 and worker 2, respectively.

## 2 Equilibrium with Costless Trade

### 2.1 Worker Objective Function

Workers seek to maximize output subject to the constraint that  $\int_0^1 l_j(i) di = 1$ . This is because wages are maximized when output is maximized (see section 2.6 below for a proof of this).

### 2.2 Task Threshold and Comparative Advantage

Let  $w_j$  be the wage paid to worker  $j$  in exchange for a unit of labor, and let  $p_j(i)$  be the price of a unit of task  $i$  produced by worker  $j$ . The worker-specific price of task  $i$  is equal to the wage paid to worker  $j$  for a unit of labor divided by the quantity of task  $i$  that can be produced by worker  $j$  with a unit of labor:

$$p_j(i) = \frac{w_j}{A_j \alpha_j(i)}. \quad (12)$$

It is clear that the worker-specific price is decreasing in worker  $j$ 's skill and task-specific productivity.

With costless task trade, the price that will actually obtain in the market is the lower of the two offered prices:

$$p(i) = \min\{p_1(i), p_2(i)\}. \quad (13)$$

In other words, each worker will purchase task  $i$  from the lowest-cost producer, including herself. Specifically, worker 1 will perform task  $i$  if:

$$\begin{aligned} p_1(i) &< p_2(i) \\ \frac{w_1}{A_1 \alpha_1(i)} &< \frac{w_2}{A_2 \alpha_2(i)} \\ \frac{w_1}{w_2} &< \frac{A_1 \alpha_1(i)}{A_2 \alpha_2(i)} \\ \omega &< \gamma(i), \end{aligned} \quad (14)$$

where  $\omega \equiv w_1/w_2$ .

Since  $\gamma'(i) < 0$ , it is clear that in equilibrium there will be a threshold task,  $i^*$ , such that:

$$\gamma(i^*) = \omega. \quad (15)$$

Worker 1 will perform all tasks in the interval  $[0, i^*]$  and worker 2 will perform all tasks in the interval  $[i^*, 1]$ .

The condition in 15 relates the relative wage to the task threshold through the comparative advantage schedule. Because the comparative advantage schedule is a decreasing function of  $i$ , this conditions implies

that the threshold value (and thus the share of tasks performed by worker) is: 1) decreasing in worker 1's relative wage,  $\omega$ , and 2) is increasing in worker 1's relative skill,  $\bar{A}$ .

### 2.3 Task Threshold and the Demand for Tasks

I can derive a second equation relating the task threshold and relative wages that depends on the demand for tasks. In the context of the model, demand is determined by the production function for the final good.

First, note that the relationship in 12 implies that worker  $j$  must be paid the same wage per unit of labor for all tasks performed in equilibrium:<sup>2</sup>

$$w_j = p(i)A_j\alpha_j(i). \quad (16)$$

Thus:

$$\begin{aligned} p(i)\alpha_1(i) &= p(i')\alpha_1(i') \equiv P_1 \text{ for any } i, i' < i^* \\ p(i)\alpha_2(i) &= p(i')\alpha_2(i') \equiv P_2 \text{ for any } i, i' > i^*. \end{aligned} \quad (17)$$

Second, note that the Cobb-Douglas production technology for the final product implies that the same share of output must be paid to each input task. Therefore for all tasks  $i, i'$  performed by worker  $j$ :

$$\begin{aligned} p(i)y_j(i) &= p(i')y_j(i') \\ p(i)A_j\alpha_j(i)l_j(i) &= p(i')A_j\alpha_j(i')l_j(i') \\ P_jl_j(i) &= P_jl_j(i') \\ l_j(i) &= l_j(i'). \end{aligned} \quad (18)$$

Therefore workers expend the same quantity of labor on all tasks performed in equilibrium. Specifically, workers will devote to each task the total quantity of labor (normalized to one unit) divided by the share of tasks performed:

$$\begin{aligned} l_1(i) &= \frac{L_1}{i^*} = \frac{1}{i^*} \\ l_2(i) &= \frac{L_2}{1-i^*} = \frac{1}{1-i^*}. \end{aligned} \quad (19)$$

Next, I can derive an expression for the relative wage,  $\omega$ , as a function of the task threshold and labor supply. Note that at the task threshold,  $i^*$ , where  $p_1(i^*) = p_2(i^*) = p(i^*)$ , it must be that the same quantity of task output can be produced either by worker 1 or worker 2:<sup>3</sup>

$$\begin{aligned} p(i^*)y_1(i^*) &= p(i^*)y_2(i^*) \\ p(i^*)A_1\alpha_1(i^*)l_1(i^*) &= p(i^*)A_2\alpha_2(i^*)l_2(i^*) \\ \frac{A_1P_1}{i^*} &= \frac{A_2P_2}{1-i^*} \\ \frac{A_1P_1}{A_2P_2} &= \frac{i^*}{1-i^*}. \end{aligned} \quad (20)$$

<sup>2</sup>This is the ‘‘law of one price for skill’’ described in Autor & Acemoglu (2011).

<sup>3</sup>This is the ‘‘no arbitrage’’ condition in Autor & Acemoglu (2011). If one worker were able to produce more than the other at the threshold, then the firm could increase profits by assigning more tasks to the more productive worker, so the threshold would not be stable. Formally, 20 holds taking the left and right limit as  $i \rightarrow i^*$ , using the Cobb-Douglas equal factor shares condition.

Thus the relative wage (for any  $i < i^*$  and  $i' > i^*$ ) is:

$$\begin{aligned}\frac{w_1}{w_2} &= \frac{p(i)A_1\alpha_1(i)}{p(i')A_2\alpha_2(i')} \\ \omega &= \frac{A_1P_1}{A_2P_2} \\ \omega &= \frac{i^*}{1-i^*}.\end{aligned}\tag{21}$$

This condition implies that relative wages are increasing in the task threshold. In the trade context, the upward-sloping curve reflects the fact that worker 1's wages are increasing in the demand for tasks that worker 1 has a comparative advantage in producing, and decreasing in the quantity of labor supplied by worker 1 relative to worker 2. These comparative statics are not evident from 21 due to the simplifying assumptions, namely the Cobb-Douglas technology with identical exponents for each task and the fact that both workers supply a single unit of labor.<sup>4</sup>

## 2.4 Solving for the Task Threshold

I now have two equilibrium conditions for  $\omega$  as a function of the task threshold: a downward sloping condition reflecting comparative advantage in 15 and an upward sloping condition reflecting demand for worker 1's labor in 21. I can solve directly for the task threshold by combining these two conditions:

$$\begin{aligned}\gamma(i^*) &= \frac{i^*}{1-i^*} \\ \bar{A}\exp(\theta(1-2i^*)) &= \frac{i^*}{1-i^*} \\ \bar{A}\exp(\theta(1-2i^*))(1-i^*) &= i^* \\ i^*[1+\bar{A}\exp(\theta(1-2i^*))] &= \bar{A}\exp(\theta(1-2i^*)) \\ i^* &= \frac{\bar{A}\exp(\theta(1-2i^*))}{1+\bar{A}\exp(\theta(1-2i^*))} \\ i^* &= \frac{A_1}{A_1+A_2\exp(\theta(2i^*-1))}.\end{aligned}\tag{22}$$

The two equations define a unique equilibrium threshold as a function of worker skills and the  $\theta$  parameter that indexes comparative advantage. Note that if  $A_1 = A_2$ , then  $i^* = \frac{1}{2}$  and  $\omega = 1$ .<sup>5</sup>

<sup>4</sup>The condition in 21 can also be derived by noting that trade must be balanced, i.e. the fraction of worker 1's income spent on tasks produced by worker 2 must be equal to the fraction of worker 2's income spent on tasks produced by worker 1:  $w_1(1-i^*) = w_2i^*$ . Note again that the Cobb-Douglas technology implies that the fraction of income spent on tasks  $i < i^*$  is equal to  $i^*$ .

<sup>5</sup>To show that this is the case:

$$\begin{aligned}i^* &= \frac{1}{1+\exp(\theta(2i^*-1))} \\ \frac{1}{2} &= \frac{1}{1+\exp(\theta(2(1/2)-1))} \\ \frac{1}{2} &= \frac{1}{2}\end{aligned}$$

## 2.5 Production Levels

Under autarky, no task trade is possible, and each worker uses only her own labor to produce the final good. Therefore the quantity of the final good produced by worker  $j$  under autarky is given by:

$$\begin{aligned}
 Y_j^A &= \exp\left[\int_0^1 \ln y_j(i) di\right] \\
 &= \exp\left[\int_0^1 \ln[A_j \alpha_j(i) l_j(i)] di\right] \\
 &= \exp\left[\int_0^1 \ln[A_j \alpha_i(i)] di\right], \tag{23}
 \end{aligned}$$

where I am using the fact that  $i^* = 1$  implicitly under autarky, and so  $l_j(i) = 1/i^* = 1$ .

To derive an expression for production under task trade, I first note that worker  $j$ 's budget to "purchase" tasks is:

$$\int_0^1 p(i) y_j(i) di = w_j L_j, \tag{24}$$

where again  $p(i)$  is the lower of the two prices offered by worker 1 and worker 2. Since  $L_j = 1$  and the Cobb-Douglas production technology implies that  $p(i) y_j(i)$  is a constant:<sup>6</sup>

$$y_j(i) = \frac{w_j}{p(i)}. \tag{25}$$

Worker 1 will produce her own tasks in the interval  $[0, i^*]$ , and will purchase tasks from worker 2 in the interval  $[i^*, 1]$  at a cost of  $p(i) = w_2/(A_2 \alpha_2(i))$ . Therefore, worker 1's level of production under task trade is given by:<sup>7</sup>

$$\begin{aligned}
 Y_1^T &= \exp\left[\int_0^1 \ln y_1(i) di\right] \\
 &= \exp\left[\int_0^{i^*} \ln[w_1/p_1(i)] di + \int_{i^*}^1 \ln[w_1/p_2(i)] di\right] \\
 &= \exp\left[\int_0^{i^*} \ln[A_1 \alpha_1(i)] di + \int_{i^*}^1 \ln[A_2 \alpha_2(i) w_1/w_2] di\right]. \tag{26}
 \end{aligned}$$

Similarly, worker 2 will purchase tasks from worker 1 in the interval  $[0, i^*]$  at a cost of  $p(i) = w_1/(A_1 \alpha_1(i))$ , and will produce her own tasks in the interval  $[i^*, 1]$ . Therefore, worker 2's level of production under task

---

<sup>6</sup>To see that this is true, note that 25 implies:

$$\begin{aligned}
 p(i) y_j(i) &= w_j L_j \\
 \int_0^1 p(i) y_j(i) di &= \int_0^1 w_j L_j di \\
 \int_0^1 p(i) y_j(i) di &= w_j L_j.
 \end{aligned}$$

<sup>7</sup>Note that worker 1 produces additional quantities of tasks in the interval  $[0, i^*]$  that she then trades to worker 2 rather than using herself in production.



trade is given by:

$$\begin{aligned}
Y_2^T &= \exp\left[\int_0^1 \ln y_2(i) di\right] \\
&= \exp\left[\int_0^{i^*} \ln[w_2/p_1(i)] di + \int_{i^*}^1 \ln[w_2/p_2(i)] di\right] \\
&= \exp\left[\int_0^{i^*} \ln[A_1\alpha_1(i)w_2/w_1] di + \int_{i^*}^1 \ln[A_2\alpha_2(i)] di\right].
\end{aligned} \tag{27}$$

## 2.6 Wage Levels

Because I am assuming a competitive market, the price of the final good,  $P^*$ , will pin down the wage. Under autarky, for each worker  $j$  the firm will maximize:

$$\begin{aligned}
\max_{w_j} \quad & P^* Y_j^A - w_j L_j \\
\max_{w_j} \quad & P^* \exp\left[\int_0^1 \ln y_j(i) di\right] - w_j \\
\max_{w_j} \quad & P^* \exp\left[\int_0^1 \ln\left[\frac{w_j}{p_j(i)}\right] di\right] - w_j \\
\max_{w_j} \quad & P^* w_j \exp\left[-\int_0^1 \ln p_j(i) di\right] - w_j.
\end{aligned} \tag{28}$$

The first order condition with respect to  $w_j$  is:

$$\begin{aligned}
P^* \exp\left[-\int_0^1 \ln p_j(i) di\right] &= 1 \\
P^* &= \exp\left[\int_0^1 \ln p_j(i) di\right] \\
\ln P^* &= \int_0^1 \ln p_j(i) di \\
\ln P^* &= \int_0^1 \ln\left[\frac{w_j}{A_j \alpha_j(i)}\right] di \\
\ln w_j &= \ln P^* + \ln A_j + \int_0^1 \ln \alpha_j(i) di \\
w_j &= P^* A_j \exp\left[\int_0^1 \ln \alpha_j(i) di\right]
\end{aligned} \tag{29}$$

Thus wages are determined by skills, task productivities, and the output price.

Note that I can re-write production under autarky as:

$$\begin{aligned}
Y_j^A &= \exp\left[\int_0^1 \ln[A_j \alpha_j(i)] di\right] \\
&= A_j \exp\left[\int_0^1 \ln[\alpha_j(i)] di\right],
\end{aligned} \tag{30}$$

so the wage level is equal to the output level scaled by the output price.

With task trade, the firm will maximize:

$$\begin{aligned}
\max_{w_1, w_2} \quad & P^*(Y_1^T + Y_2^T) - w_1 - w_2 \\
\max_{w_1, w_2} \quad & P^* \left( \exp \left[ \int_0^{i^*} \ln[w_1/p_1(i)] di + \int_{i^*}^1 \ln[w_1/p_2(i)] di \right] \right. \\
& \left. + \exp \left[ \int_0^{i^*} \ln[w_2/p_1(i)] di + \int_{i^*}^1 \ln[w_2/p_2(i)] di \right] \right) - w_1 - w_2 \\
\max_{w_1, w_2} \quad & P^* \left( w_1 \exp \left[ - \int_0^{i^*} \ln p_1(i) di - \int_{i^*}^1 \ln p_2(i) di \right] \right. \\
& \left. + w_2 \exp \left[ - \int_0^{i^*} \ln p_1(i) di - \int_{i^*}^1 \ln p_2(i) di \right] \right) - w_1 - w_2.
\end{aligned} \tag{31}$$

The first order condition with respect to  $w_1$  (which is identical to the first order condition with respect to  $w_2$ ) is:

$$\begin{aligned}
P^* \exp \left[ - \int_0^{i^*} \ln p_1(i) di - \int_{i^*}^1 \ln p_2(i) di \right] &= 1 \\
P^* &= \exp \left[ \int_0^{i^*} \ln p_1(i) di + \int_{i^*}^1 \ln p_2(i) di \right] \\
P^* &= \exp \left[ \int_0^{i^*} \ln \left[ \frac{w_1}{A_1 \alpha_1(i)} \right] di + \int_{i^*}^1 \ln \left[ \frac{w_2}{A_2 \alpha_2(i)} \right] di \right] \\
w_1^{i^*} w_2^{1-i^*} &= P^* A_1^{i^*} A_2^{1-i^*} \exp \left[ \int_0^{i^*} \ln \alpha_1(i) di + \int_{i^*}^1 \ln \alpha_2(i) di \right]
\end{aligned} \tag{32}$$

Note that I have shown in 22 that I can solve directly for the threshold value,  $i$ , as a function of  $A_1$ ,  $A_2$  and  $\theta$  (or more generally, as a function of  $A_1$ ,  $A_2$  and the comparative advantage schedules). I can then solve for  $\omega$  as a function of  $i^*$ , using 21. Thus I can use 32 to express  $w_1$  as a function of  $\omega$ ,  $A_1$ ,  $A_2$  and the comparative advantage schedules, as follows:

$$\begin{aligned}
w_1^{i^*} \omega^{-(1-i^*)} &= w_1^{-(1-i^*)} P^* A_1^{i^*} A_2^{1-i^*} \exp \left[ \int_0^{i^*} \ln \alpha_1(i) di + \int_{i^*}^1 \ln \alpha_2(i) di \right] \\
w_1 &= P^* A_1^{i^*} (A_2 \omega)^{1-i^*} \exp \left[ \int_0^{i^*} \ln \alpha_1(i) di + \int_{i^*}^1 \ln \alpha_2(i) di \right]
\end{aligned} \tag{33}$$

Similarly, I can solve for  $w_2$  as a function of  $\omega$ ,  $A_1$ ,  $A_2$  and the comparative advantage schedules:

$$\begin{aligned}
\omega^{i^*} w_2^{1-i^*} &= w_2^{-i^*} A_1^{i^*} A_2^{1-i^*} \exp \left[ \int_0^{i^*} \ln \alpha_1(i) di + \int_{i^*}^1 \ln \alpha_2(i) di \right] \\
w_2 &= P^* A_2^{1-i^*} (A_1 \omega^{-1})^{i^*} \exp \left[ \int_0^{i^*} \ln \alpha_1(i) di + \int_{i^*}^1 \ln \alpha_2(i) di \right].
\end{aligned} \tag{34}$$

Note that I can re-write production under trade as:

$$\begin{aligned}
Y_1^T &= \exp\left[\int_0^{i^*} \ln[A_1\alpha_1(i)]di + \int_{i^*}^1 \ln[A_2\alpha_2(i)w_1/w_2]di\right] \\
&= A_1^{i^*} (A_2\omega)^{1-i^*} \exp\left[\int_0^{i^*} \ln\alpha_1(i)di + \int_{i^*}^1 \ln\alpha_2(i)di\right]
\end{aligned} \tag{35}$$

$$\begin{aligned}
Y_2^T &= \exp\left[\int_0^{i^*} \ln[A_1\alpha_1(i)w_2/w_1]di + \int_{i^*}^1 \ln[A_2\alpha_2(i)]di\right] \\
&= A_2^{1-i^*} (A_1\omega^{-1})^{i^*} \exp\left[\int_0^{i^*} \ln\alpha_1(i)di + \int_{i^*}^1 \ln\alpha_2(i)di\right].
\end{aligned} \tag{36}$$

Thus again, wages are equal to the output level scaled by the output price.

## 2.7 Gains from Trade

The proportional gains from task trade for worker 1 are:

$$\begin{aligned}
\Delta Y_1 &= \frac{Y_1^T}{Y_1^A} \\
&= \frac{\exp\left(\int_0^{i^*} \ln[A_1\alpha_1(i)]di + \int_{i^*}^1 \ln[A_2\alpha_2(i)w_1/w_2]di\right)}{\exp\left(\int_0^1 \ln[A_1\alpha_1(i)]di\right)} \\
&= \frac{\exp\left(\int_0^{i^*} \ln[A_1\alpha_1(i)]di\right)\exp\left(\int_{i^*}^1 \ln[A_2\alpha_2(i)w_1/w_2]di\right)}{\exp\left(\int_0^{i^*} \ln[A_1\alpha_1(i)]di\right)\exp\left(\int_{i^*}^1 \ln[A_1\alpha_1(i)]di\right)} \\
&= \exp\left(\int_{i^*}^1 (\ln[A_2\alpha_2(i)w_1/w_2] - \ln[A_1\alpha_1(i)])di\right) \\
&= \exp\left(\int_{i^*}^1 \ln\left[\frac{\alpha_2(i)}{\alpha_1(i)} \frac{A_2w_1}{A_1w_2}\right]di\right) \\
&= \exp\left(\int_{i^*}^1 \ln\left[\frac{\gamma(i^*)}{\gamma(i)}\right]di\right).
\end{aligned} \tag{37}$$

This quantity is positive because  $i^*$  is chosen to satisfy the condition in 14, which is that  $\gamma(i) < \omega = \gamma(i^*)$  in the interval  $[i^*, 1]$ , where worker 2 has a comparative advantage.

Similarly, the gains from task trade for worker 2 are given by:

$$\begin{aligned}
\Delta Y_2 &= \frac{Y_2^T}{Y_2^A} \\
&= \frac{\exp(\int_0^{i^*} \ln[A_1\alpha_1(i)w_2/w_1]di + \int_{i^*}^1 \ln[A_2\alpha_2(i)]di)}{\exp(\int_0^1 \ln[A_2\alpha_2(i)]di)} \\
&= \frac{\exp(\int_{i^*}^1 \ln[A_2\alpha_2(i)]di)\exp(\int_0^{i^*} \ln[A_1\alpha_1(i)w_2/w_1]di)}{\exp(\int_{i^*}^1 \ln[A_2\alpha_2(i)]di)\exp(\int_0^{i^*} \ln[A_2\alpha_2(i)]di)} \\
&= \exp\left(\int_0^{i^*} (\ln[A_1\alpha_1(i)w_2/w_1] - \ln[A_2\alpha_2(i)])di\right) \\
&= \exp\left(\int_0^{i^*} \ln\left[\frac{\alpha_1(i)}{\alpha_2(i)}\frac{A_1w_2}{A_2w_1}\right]di\right) \\
&= \exp\left(\int_0^{i^*} \ln\left[\frac{\gamma(i)}{\gamma(i^*)}\right]di\right). \tag{38}
\end{aligned}$$

This quantity is positive, as well, because  $\gamma(i) > \gamma(i^*)$  in the interval  $[0, i^*]$ , where worker 1 has a comparative advantage.

Using the specification in 6 for the comparative advantage schedule, I can express the gains from trade

as a function of the  $\theta$  parameter:

$$\begin{aligned}
\Delta Y_1 &= \exp\left(\int_{i^*}^1 \ln\left[\frac{\gamma(i^*)}{\gamma(i)}\right] di\right) \\
&= \exp\left(\int_{i^*}^1 \ln\left[\frac{\bar{A}\exp(\theta(1-2i^*))}{\bar{A}\exp(\theta(1-2i))}\right] di\right) \\
&= \exp\left(\int_{i^*}^1 \ln[\exp[\theta - 2\theta i^* - \theta + 2\theta i]] di\right) \\
&= \exp\left(\int_{i^*}^1 2\theta[i - i^*] di\right) \\
&= \exp\left(2\theta\left[\frac{i^2}{2} - i^*i\right]\Big|_{i^*}^1\right) \\
&= \exp\left(2\theta\left[\frac{1}{2} - i^* - \frac{i^{*2}}{2} + i^{*2}\right]\right) \\
&= \exp\left(2\theta\left[\frac{i^{*2}}{2} - i^* + \frac{1}{2}\right]\right) \\
&= \exp(\theta[i^{*2} - 2i^* + 1]) \\
&= \exp(\theta[i^* - 1]^2) \tag{39}
\end{aligned}$$

$$\begin{aligned}
\Delta Y_2 &= \exp\left(\int_0^{i^*} \ln\left[\frac{\gamma(i)}{\gamma(i^*)}\right] di\right) \\
&= \exp\left(\int_0^{i^*} \ln\left[\frac{\bar{A}\exp(\theta(1-2i))}{\bar{A}\exp(\theta(1-2i^*))}\right] di\right) \\
&= \exp\left(\int_0^{i^*} \ln[\exp[\theta - 2\theta i - \theta + 2\theta i^*]] di\right) \\
&= \exp\left(\int_0^{i^*} 2\theta[i^* - i] di\right) \\
&= \exp\left(2\theta\left[i^*i - \frac{i^2}{2}\right]\Big|_0^{i^*}\right) \\
&= \exp\left(2\theta\left[i^{*2} - \frac{i^{*2}}{2}\right]\right) \\
&= \exp\left(2\theta\left[\frac{i^{*2}}{2}\right]\right) \\
&= \exp(\theta i^{*2}). \tag{40}
\end{aligned}$$

It is clear from 39 and 40 that the gains from trade are increasing in  $\theta$ .

### 3 Equilibrium with Trading Costs

#### 3.1 Defining Social Skills as Trading Costs

In section 2, trading tasks was costless. Now trading tasks requires costly coordination among workers, and I define *social skill* as a worker-specific reduction in coordination costs. Specifically, define  $S_j$  as a worker-specific depreciation factor, and define  $S_{j,k} = S_j * S_k$  as a depreciation factor applied to all task trades between worker  $j$  and worker  $k$ . Let  $S_{j,j} = 1, \forall j$ , so that workers can trade costlessly with themselves. With only two workers, the trade cost is symmetric, and I can define  $S^* = S_1 * S_2$ .

When worker 1 purchases  $y_1(i)$  units of task  $i$  from worker 2, she pays  $p(i)y_1(i)$  but receives only  $S^*y_1(i)$  units of task  $i$ . Therefore the gross price of task  $i$  produced by worker  $j$  and purchased by worker  $k$  (where  $j \neq k$ ), including trading costs, becomes:

$$\begin{aligned} p_j^S(i) &= \frac{p(i)}{S^*} \\ p_j^S(i) &= \frac{w_j}{S^* A_j \alpha_j(i)} \end{aligned} \quad (41)$$

It is clear that workers with high levels of social skill pay a lower coordination cost to engage in task trades with other workers.

#### 3.2 Equilibrium Task Thresholds with Social Skills

With these adjusted costs, worker 1 will prefer to produce her own tasks rather than purchase them from worker 2 if:

$$\begin{aligned} p_1(i) &< p_2^S(i) \\ \frac{w_1}{A_1 \alpha_1(i)} &< \frac{w_2}{S^* A_2 \alpha_2(i)} \\ \omega &< \frac{\gamma(i)}{S^*}. \end{aligned} \quad (42)$$

Worker 2 will prefer to produce her own tasks rather than purchase them from worker 1 if:

$$\begin{aligned} p_2(i) &< p_1^S(i) \\ \frac{w_2}{A_2 \alpha_2(i)} &< \frac{w_1}{S^* A_1 \alpha_1(i)} \\ \omega &> S^* \gamma(i). \end{aligned} \quad (43)$$

Thus in equilibrium there will be two task thresholds, defined by:

$$\gamma(i^H) = S^* \omega \quad (44)$$

$$\gamma(i^L) = \frac{\omega}{S^*}. \quad (45)$$

Since  $\gamma'(i) < 0$  and  $S^* < 1$ , it is clear that  $i^H > i^* > i^L$ .

Worker 1 will produce all tasks  $i < i^H$  and worker 2 will produce all tasks  $i > i^L$ . In other words, tasks in the interval  $[0, i^L]$  will be produced exclusively by worker 1, tasks in the interval  $[i^L, i^H]$  will be non-traded (produced by both workers for their own use), and tasks in the interval  $[i^H, 1]$  will be produced exclusively by

worker 2. If  $S^*$  is low enough, trade will not be worthwhile for any  $i$ , and production will revert to autarky (i.e.  $i^L = 0$  and  $i^H = 1$ ).

Note that 45 gives us two equations for  $\omega$ . Setting these equal, I can derive an equation for  $i^H - i^L$ , as follows:

$$\begin{aligned}
\frac{\gamma(i^H)}{S^*} &= S^* \gamma(i^L) \\
\frac{\gamma(i^H)}{\gamma(i^L)} &= (S^*)^2 \\
\frac{\exp(\theta(1 - 2i^H))}{\exp(\theta(1 - 2i^L))} &= (S^*)^2 \\
\exp(2\theta(i^L - i^H)) &= (S^*)^2 \\
2\theta(i^L - i^H) &= 2\ln S^* \\
i^H - i^L &= -\frac{\ln S^*}{\theta}
\end{aligned} \tag{46}$$

It is clear that  $i^H - i^L$  is decreasing in  $S^*$ . In other words, as  $S^*$  rises,  $i^H$  approaches  $i^*$  from above and  $i^L$  approaches  $i^*$  from below. When  $S^* = 1$ , the model reverts to the case with no trading costs.

To derive the “demand” equation relating  $\omega$ ,  $i^L$  and  $i^H$ , comparable to 21, let us go directly to the trade balance condition described in footnote 4. Specifically, it must be the case that the fraction of worker 1’s income spent on traded goods produced by worker 2 must equal the fraction of worker 2’s income spent on traded goods produced by worker 1:

$$\begin{aligned}
w_1(1 - i^H) &= w_2 i^L \\
\omega &= \frac{i^L}{1 - i^H}.
\end{aligned} \tag{47}$$

Thus combining 44, 45 and 47, the equilibrium thresholds with trading costs are defined by the following series of equalities:

$$\frac{\gamma(i^H)}{S^*} = S^* \gamma(i^L) = \frac{i^L}{1 - i^H}. \tag{48}$$

Re-arranging:

$$\begin{aligned}
\frac{\gamma(i^H)}{S^*} &= S^* \gamma(i^L) = \frac{i^L}{1 - i^H} \\
\frac{\gamma(i^H)(1 - i^H)}{S^* i^L} &= \frac{S^* \gamma(i^L)(1 - i^H)}{i^L} = 1 \\
\frac{\bar{A} \exp(\theta(1 - 2i^H))(1 - i^H)}{S^* i^L} - 1 &= \frac{\bar{A} S^* \exp(\theta(1 - 2i^L))(1 - i^H)}{i^L} - 1 = 0.
\end{aligned} \tag{49}$$

This gives us two functions with two unknowns ( $i^H$  and  $i^L$ ) and three parameters ( $\bar{A}$ ,  $S^*$  and  $\theta$ ). Plotting these two implicit functions in the  $(i^L, i^H)$  space shows that their intersection defines the unique equilibrium values of  $i^H$  and  $i^L$ .

It can be verified numerically that, comparable to the case with no trading costs, when  $A_1 = A_2$  so that  $\bar{A} = 1$ , then  $i^L = 1 - i^H$  and  $\omega = 1$ . In this case, I can solve for the thresholds by setting 44 equal to 45, as

follows:

$$\begin{aligned}
\frac{\gamma(i^H)}{S^*} &= S^* \gamma(i^L) \\
\frac{\bar{A} \exp(\theta(1 - 2(1 - i^L)))}{S^*} &= S^* \bar{A} \exp(\theta(1 - 2i^L)) \\
\exp(\theta - 2\theta + 2\theta i^L - \theta + 2\theta i^L) &= (S^*)^2 \\
4\theta i^L - 2\theta &= 2 \ln S^* \\
2\theta i^L &= \ln S^* + \theta \\
i^L &= \frac{\ln S^*}{2\theta} + \frac{1}{2}.
\end{aligned} \tag{50}$$

Since  $\ln S^* < 0$ , it is clear that  $i^L$  is increasing in  $\theta$ . Also:

$$\begin{aligned}
i^H &= 1 - i^L \\
&= -\frac{\ln S^*}{2\theta} + \frac{1}{2}.
\end{aligned} \tag{51}$$

This special case makes it very clear that for some values of  $S^*$  and  $\theta$  - specifically, low values of both parameters - trade is not worthwhile (i.e. the implied level of  $i^L$  is less than zero) and autarky will prevail. This is in contrast to case with costless trade - equation 22 implies that some level of trade is always optimal, although  $i^*$  may approach arbitrarily close to zero or one depending on  $\theta$ ,  $A_1$  and  $A_2$ .

### 3.3 Production Levels with Social Skills

With trading costs, worker 1 will produce:

$$\begin{aligned}
Y_1^S &= \exp\left(\int_0^1 \ln y_1(i) di\right) \\
&= \exp\left(\int_0^{i^H} \ln[w_1/p_1(i)] di + \int_{i^H}^1 \ln[w_1/p_2^S(i)] di\right) \\
&= \exp\left(\int_0^{i^H} \ln[A_1 \alpha_1(i)] di + \int_{i^H}^1 \ln[S^* A_2 \alpha_2(i) w_1/w_2] di\right).
\end{aligned} \tag{52}$$

Worker 2 will produce:

$$\begin{aligned}
Y_2^S &= \exp\left(\int_0^1 \ln y_2(i) di\right) \\
&= \exp\left(\int_0^{i^L} \ln[w_2/p_1^S(i)] di + \int_{i^L}^1 \ln[w_2/p_2(i)] di\right) \\
&= \exp\left(\int_0^{i^L} \ln[S^* A_1 \alpha_1(i) w_2/w_1] di + \int_{i^L}^1 \ln[A_2 \alpha_2(i)] di\right).
\end{aligned} \tag{53}$$



### 3.4 Wage Levels with Social Skills

With trading costs, the firm will maximize:

$$\begin{aligned}
\max_{w_1, w_2} \quad & P^*(Y_1^S + Y_2^S) - w_1 - w_2 \\
\max_{w_1, w_2} \quad & P^* \left( \exp \left[ \int_0^{i^H} \ln[w_1/p_1(i)] di + \int_{i^H}^1 \ln[w_1/p_2^S(i)] di \right] \right. \\
& \left. + \exp \left[ \int_0^{i^L} \ln[w_2/p_1^S(i)] di + \int_{i^L}^1 \ln[w_2/p_2(i)] di \right] \right) - w_1 - w_2 \\
\max_{w_1, w_2} \quad & P^* \left( w_1 \exp \left[ - \int_0^{i^H} \ln p_1(i) di - \int_{i^H}^1 \ln [p_2(i)/S^*] di \right] \right. \\
& \left. w_2 \exp \left[ - \int_0^{i^L} \ln [p_1(i)/S^*] di - \int_{i^L}^1 \ln p_2(i) di \right] \right) - w_1 - w_2.
\end{aligned} \tag{54}$$

The first order condition with respect to  $w_1$  is:

$$\begin{aligned}
P^* &= \exp \left[ \int_0^{i^H} \ln p_1(i) di + \int_{i^H}^1 \ln [p_2(i)/S^*] di \right] \\
P^* &= \exp \left[ \int_0^{i^H} \ln \left[ \frac{w_1}{A_1 \alpha_1(i)} \right] di + \int_{i^H}^1 \ln \left[ \frac{w_2}{S^* A_2 \alpha_2(i)} \right] di \right] \\
w_1^{i^H} w_2^{1-i^H} &= P^* (S^*)^{1-i^H} A_1^{i^H} A_2^{1-i^H} \exp \left[ \int_0^{i^H} \ln \alpha_1(i) di + \int_{i^H}^1 \ln \alpha_2(i) di \right].
\end{aligned} \tag{55}$$

The first order condition with respect to  $w_2$  is:

$$\begin{aligned}
P^* &= \exp \left[ \int_0^{i^L} \ln [p_1(i)/S^*] di + \int_{i^L}^1 \ln p_2(i) di \right] \\
P^* &= \exp \left[ \int_0^{i^L} \ln \left[ \frac{w_1}{S^* A_1 \alpha_1(i)} \right] di + \int_{i^L}^1 \ln \left[ \frac{w_2}{A_2 \alpha_2(i)} \right] di \right] \\
w_1^{i^L} w_2^{1-i^L} &= P^* (S^*)^{i^L} A_1^{i^L} A_2^{1-i^L} \exp \left[ \int_0^{i^L} \ln \alpha_1(i) di + \int_{i^L}^1 \ln \alpha_2(i) di \right].
\end{aligned} \tag{56}$$

I solve for  $w_1$  using 55, as follows:

$$\begin{aligned}
w_1^{i^H} \omega^{-(1-i^H)} &= w_1^{-(1-i^H)} P^* (S^*)^{1-i^H} A_1^{i^H} A_2^{1-i^H} \exp \left[ \int_0^{i^H} \ln \alpha_1(i) di + \int_{i^H}^1 \ln \alpha_2(i) di \right] \\
w_1 &= P^* A_1^{i^H} (S^* A_2 \omega)^{1-i^H} \exp \left[ \int_0^{i^H} \ln \alpha_1(i) di + \int_{i^H}^1 \ln \alpha_2(i) di \right]
\end{aligned} \tag{57}$$

I solve for  $w_2$  using 56, as follows:

$$\begin{aligned}
\omega^{i^L} w_2^{1-i^L} &= w_2^{-i^L} P^* (S^*)^{i^L} A_1^{i^L} A_2^{1-i^L} \exp \left[ \int_0^{i^L} \ln \alpha_1(i) di + \int_{i^L}^1 \ln \alpha_2(i) di \right] \\
w_2 &= P^* (S^* A_1 \omega^{-1})^{i^L} A_2^{1-i^L} \exp \left[ \int_0^{i^L} \ln \alpha_1(i) di + \int_{i^L}^1 \ln \alpha_2(i) di \right].
\end{aligned} \tag{58}$$

Again, I can re-write with expressions for production with trading costs as follows:

$$\begin{aligned}
Y_1^S &= \exp\left(\int_0^{i^H} \ln[A_1\alpha_1(i)]di + \int_{i^H}^1 \ln[S^* A_2\alpha_2(i)w_1/w_2]di\right) \\
&= \exp(i^H \ln A_1 + (1 - i^H) \ln[S^* A_2 w_1/w_2] + \int_0^{i^H} \ln[\alpha_1(i)]di + \int_{i^H}^1 \ln[\alpha_2(i)]di) \\
&= A_1^{i^H} (S^* A_2 \omega)^{1-i^H} \exp\left(\int_0^{i^H} \ln[\alpha_1(i)]di + \int_{i^H}^1 \ln[\alpha_2(i)]di\right) \tag{59}
\end{aligned}$$

$$\begin{aligned}
Y_2^S &= \exp\left(\int_0^{i^L} \ln[S^* A_1\alpha_1(i)w_2/w_1]di + \int_{i^L}^1 \ln[A_2\alpha_2(i)]di\right) \\
&= \exp(i^L \ln[S^* A_1 w_2/w_1] + (1 - i^L) \ln A_2 + \int_0^{i^L} \ln[\alpha_1(i)]di + \int_{i^L}^1 \ln[\alpha_2(i)]di) \\
&= (S^* A_1 \omega^{-1})^{i^L} A_2^{1-i^L} \exp\left(\int_0^{i^L} \ln[\alpha_1(i)]di + \int_{i^L}^1 \ln[\alpha_2(i)]di\right) \tag{60}
\end{aligned}$$

Thus wages are once more equal to the output level scaled by the output price. Finally, I can see that if  $S^*$  is sufficiently low such that that trade is not worthwhile, so  $i^H = 1$  and  $i^L = 0$ , then the wage equations reduce to 29, the expression for wages under autarky.

### 3.5 Complementarity of Cognitive and Social Skills

In this section, I want to show that cognitive skill defined as  $A_j$  and social skill  $S^*$  are complements in production. For simplicity, consider the special case where  $A_1 = A_2 = A$ , so  $\bar{A} = \omega = 1$ . I will derive comparative statics to determine the impact on output of raising the level of cognitive skill,  $A$ .

Note that in this case, the expressions for production in 59 and 60 become:

$$Y_1^S = A(S^*)^{1-i^H} \exp\left(\int_0^{i^H} \ln[\alpha_1(i)]di + \int_{i^H}^1 \ln[\alpha_2(i)]di\right) \tag{61}$$

$$Y_2^S = A(S^*)^{i^L} \exp\left(\int_0^{i^L} \ln[\alpha_1(i)]di + \int_{i^L}^1 \ln[\alpha_2(i)]di\right) \tag{62}$$

Note also that in this case the expressions for the thresholds in terms of comparative advantage, 44 and 45, become:<sup>8</sup>

$$\gamma(i^H) = S^* \tag{63}$$

$$\gamma(i^L) = \frac{1}{S^*}. \tag{64}$$

The derivatives of production with respect to cognitive skill are thus:

---

<sup>8</sup>These expressions imply that the derivatives of the thresholds with respect to  $S^*$  are:

$$\begin{aligned}
\frac{di^H}{dS^*} &= \frac{1}{\gamma'(i^H)} \\
\frac{di^L}{dS^*} &= -\frac{1}{\gamma'(i^L)(S^*)^2}.
\end{aligned}$$

$$\begin{aligned}
\frac{dY_1^S}{dA} &= (S^*)^{1-i^H} \exp\left(\int_0^{i^H} \ln[\alpha_1(i)]di + \int_{i^H}^1 \ln[\alpha_2(i)]di\right) \\
&\quad + \frac{di^H}{dA} A(S^*)^{1-i^H} \exp\left(\int_0^{i^H} \ln[\alpha_1(i)]di + \int_{i^H}^1 \ln[\alpha_2(i)]di\right) \ln\left(\frac{\alpha_1(i^H)}{S^* \alpha_2(i^H)}\right) \\
&= (S^*)^{1-i^H} \exp\left(\int_0^{i^H} \ln[\alpha_1(i)]di + \int_{i^H}^1 \ln[\alpha_2(i)]di\right) \\
&\quad + \frac{di^H}{dA} A(S^*)^{1-i^H} \exp\left(\int_0^{i^H} \ln[\alpha_1(i)]di + \int_{i^H}^1 \ln[\alpha_2(i)]di\right) \ln\left(\frac{\gamma(i^H)}{\gamma(i^H)}\right) \\
&= (S^*)^{1-i^H} \exp\left(\int_0^{i^H} \ln[\alpha_1(i)]di + \int_{i^H}^1 \ln[\alpha_2(i)]di\right) \tag{65}
\end{aligned}$$

$$\begin{aligned}
\frac{dY_2^S}{dA} &= (S^*)^{i^L} \exp\left(\int_0^{i^L} \ln[\alpha_1(i)]di + \int_{i^L}^1 \ln[\alpha_2(i)]di\right) \\
&\quad + \frac{di^L}{dA} A(S^*)^{i^L} \exp\left(\int_0^{i^L} \ln[\alpha_1(i)]di + \int_{i^L}^1 \ln[\alpha_2(i)]di\right) \ln\left(\frac{S^* \alpha_1(i^L)}{\alpha_2(i^L)}\right) \\
&= (S^*)^{i^L} \exp\left(\int_0^{i^L} \ln[\alpha_1(i)]di + \int_{i^L}^1 \ln[\alpha_2(i)]di\right) \\
&\quad + \frac{di^L}{dA} A(S^*)^{i^L} \exp\left(\int_0^{i^L} \ln[\alpha_1(i)]di + \int_{i^L}^1 \ln[\alpha_2(i)]di\right) \ln\left(\frac{\gamma(i^L)}{\gamma(i^L)}\right) \\
&= (S^*)^{i^L} \exp\left(\int_0^{i^L} \ln[\alpha_1(i)]di + \int_{i^L}^1 \ln[\alpha_2(i)]di\right). \tag{66}
\end{aligned}$$

Next, I take the second derivative with respect to own cognitive skill and  $S^*$ :

$$\begin{aligned}
\frac{d^2 Y_1^S}{dA dS^*} &= (1 - i^H)(S^*)^{-i^H} \exp\left(\int_0^{i^H} \ln[\alpha_1(i)]di + \int_{i^H}^1 \ln[\alpha_2(i)]di\right) \\
&\quad + \frac{di^H}{dS^*} (S^*)^{1-i^H} \exp\left(\int_0^{i^H} \ln[\alpha_1(i)]di + \int_{i^H}^1 \ln[\alpha_2(i)]di\right) \ln\left(\frac{\alpha_1(i^H)}{S^* \alpha_2(i^H)}\right) \\
&= (1 - i^H)(S^*)^{-i^H} \exp\left(\int_0^{i^H} \ln[\alpha_1(i)]di + \int_{i^H}^1 \ln[\alpha_2(i)]di\right) \tag{67}
\end{aligned}$$

$$\begin{aligned}
\frac{d^2 Y_2^S}{dA dS^*} &= i^L (S^*)^{i^L-1} \exp\left(\int_0^{i^L} \ln[\alpha_1(i)]di + \int_{i^L}^1 \ln[\alpha_2(i)]di\right) \\
&\quad + \frac{di^L}{dS^*} \exp\left(\int_0^{i^L} \ln[\alpha_1(i)]di + \int_{i^L}^1 \ln[\alpha_2(i)]di\right) \ln\left(\frac{S^* \alpha_1(i^L)}{\alpha_2(i^L)}\right) \\
&= i^L (S^*)^{i^L-1} \exp\left(\int_0^{i^L} \ln[\alpha_1(i)]di + \int_{i^L}^1 \ln[\alpha_2(i)]di\right). \tag{68}
\end{aligned}$$

Both of these expressions are positive.

Thus it is clear that in this simple case, cognitive and social skill are complements in production.

### 3.6 Complementarity of $\theta$ and Social Skill in Gains from Trade

In this section, I show that social skill  $S^*$  and  $\theta$  are complements in the gains from trade.

With trading costs, worker 1's gains from trade will be:

$$\begin{aligned}
\Delta Y_1^S &= \frac{Y_1^S}{Y_1^A} \\
&= \frac{\exp(\int_0^{i^H} \ln[A_1 \alpha_1(i)] di + \int_{i^H}^1 \ln[S^* A_2 \alpha_2(i) w_1/w_2] di)}{\exp(\int_0^1 \ln[A_1 \alpha_1(i)] di)} \\
&= \exp\left(\int_{i^H}^1 \ln\left[\frac{S^* A_2 \alpha_2(i) w_1}{A_1 \alpha_1(i) w_2}\right] di\right) \\
&= \exp\left(\int_{i^H}^1 \ln\left[\frac{S^* \gamma(i^*)}{\gamma(i)}\right] di\right) \\
&= \exp\left(\int_{i^H}^1 [2\theta(i - i^*) + \ln S^*] di\right) \\
&= \exp\left(2\theta\left[\frac{i^2}{2} - i^* i\right] + \ln S^* i\Big|_{i^H}^1\right) \\
&= \exp\left(2\theta\left[\frac{1}{2} - i^* - \frac{(i^H)^2}{2} + i^* i^H\right] + \ln S^*(1 - i^H)\right) \\
&= \exp(\theta[1 - (i^H)^2 - 2i^*(1 - i^H)] + \ln S^*(1 - i^H)) \\
&= \exp(\theta[(1 + i^H)(1 - i^H) - 2i^*(1 - i^H)] + \ln S^*(1 - i^H)) \\
&= \exp((1 - i^H)[\theta(1 - i^*) + [i^H - i^*]] + \ln S^*)
\end{aligned} \tag{69}$$

Worker 2's gains from trade will be:

$$\begin{aligned}
\Delta Y_2^S &= \frac{Y_2^S}{Y_2^A} \\
&= \frac{\exp(\int_0^{i^L} \ln[S^* A_1 \alpha_1(i) w_2/w_1] di + \int_{i^L}^1 \ln[A_2 \alpha_2(i)] di)}{\exp(\int_0^1 \ln[A_2 \alpha_2(i)] di)} \\
&= \exp\left(\int_0^{i^L} \ln\left[\frac{S^* A_1 \alpha_1(i) w_2}{A_2 \alpha_2(i) w_1}\right] di\right) \\
&= \exp\left(\int_0^{i^L} \ln\left[\frac{S^* \gamma(i)}{\gamma(i^*)}\right] di\right) \\
&= \exp\left(\int_0^{i^L} [2\theta(i^* - i) + \ln S^*] di\right) \\
&= \exp\left(2\theta\left[i^* i - \frac{i^2}{2}\right] + \ln S^* i\Big|_0^{i^L}\right) \\
&= \exp\left(2\theta\left[i^* i^L - \frac{(i^L)^2}{2}\right] + \ln S^* i^L\right) \\
&= \exp(i^L[\theta(2i^* - i^L) + \ln S^*]).
\end{aligned} \tag{70}$$

As in section 3.5, I consider the special case where  $A_1 = A_2 = A$  and  $\bar{A} = \omega = 1$ . In this case,  $i^L$  and  $i^H$

are defined as in 50 and 51, and  $i^* = \frac{1}{2}$ . Thus 69 and 70 become:

$$\begin{aligned}\Delta Y_1^S &= \exp\left(\left(1 + \frac{\ln S^*}{2\theta} - \frac{1}{2}\right)\left[\theta\left(\left[1 - \frac{1}{2}\right] + \left[-\frac{\ln S^*}{2\theta} + \frac{1}{2} - \frac{1}{2}\right]\right) + \ln S^*\right]\right) \\ &= \exp\left(\left(\frac{\ln S^*}{2\theta} + \frac{1}{2}\right)\left[\theta\left(-\frac{\ln S^*}{2\theta} + \frac{1}{2}\right) + \ln S^*\right]\right)\end{aligned}\quad (71)$$

$$\begin{aligned}\Delta Y_2^S &= \exp\left(\left(\frac{\ln S^*}{2\theta} + \frac{1}{2}\right)\left[\theta\left(1 - \frac{\ln S^*}{2\theta} - \frac{1}{2}\right) + \ln S^*\right]\right) \\ &= \exp\left(\left(\frac{\ln S^*}{2\theta} + \frac{1}{2}\right)\left[\theta\left(-\frac{\ln S^*}{2\theta} + \frac{1}{2}\right) + \ln S^*\right]\right).\end{aligned}\quad (72)$$

Note that the gains from trade are identical for the two workers, due to the assumption of equal cognitive skill (i.e. that  $\bar{A} = 1$ ).

The derivatives of the gains from trade with respect to  $S^*$  are given by:

$$\begin{aligned}\frac{d\Delta Y_1^S}{dS^*} &= \Delta Y_1^S \left( \frac{1}{2\theta S^*} \left[ \theta \left( -\frac{\ln S^*}{2\theta} + \frac{1}{2} \right) + \ln S^* \right] + \left( \frac{\ln S^*}{2\theta} + \frac{1}{2} \right) \left[ -\frac{1}{2S^*} + \frac{1}{S^*} \right] \right) \\ &= \Delta Y_1^S \left( \frac{1}{2\theta S^*} \left[ -\frac{\ln S^*}{2} + \frac{\theta}{2} + \ln S^* \right] - \frac{\ln S^*}{4\theta S^*} + \frac{\ln S^*}{2\theta S^*} - \frac{1}{4S^*} + \frac{1}{2S^*} \right) \\ &= \Delta Y_1^S \left( \frac{1}{2\theta S^*} \left[ \frac{\ln S^* + \theta}{2} - \frac{\ln S^*}{2} + \ln S^* - \frac{\theta}{2} + \theta \right] \right) \\ &= \Delta Y_1^S \left( \frac{\ln S^* + \theta}{2\theta S^*} \right)\end{aligned}\quad (73)$$

$$\frac{d\Delta Y_2^S}{dS^*} = \Delta Y_2^S \left( \frac{\ln S^* + \theta}{2\theta S^*} \right)\quad (74)$$

Note that  $\frac{d\Delta Y_i^S}{dS^*} > 0$  since  $\frac{\ln S^* + \theta}{2\theta S^*} = \frac{1}{S^*} \left( \frac{\ln S^*}{2\theta} + \frac{1}{2} \right) = \frac{i^L}{S^*}$ , by equation 50. Thus the gains from trade are increasing in social skill.

Finally, I take the second derivative of 73 and 74 with respect to  $S^*$  and  $\theta$ :

$$\begin{aligned}
\frac{d^2 \Delta Y_1^S}{dS^* d\theta} &= \Delta Y_1^S \left( \frac{\ln S^* + \theta}{2\theta S^*} \right) \left( -\frac{\ln S^*}{2\theta^2} \left[ \theta \left( -\frac{\ln S^*}{2\theta} + \frac{1}{2} \right) + \ln S^* \right] + \right. \\
&\quad \left. \left( \frac{\ln S^*}{2\theta} + \frac{1}{2} \right) \left[ \left( -\frac{\ln S^*}{2\theta} + \frac{1}{2} \right) + \theta \frac{\ln S^*}{2\theta^2} \right] + \Delta Y_1^S \left( \frac{1}{2\theta S^*} - \frac{\ln S^* + \theta}{4\theta^2 (S^*)^2} 2S^* \right) \right) \\
&= \Delta Y_1^S \left( \frac{\ln S^* + \theta}{2\theta S^*} \right) \left( \frac{(\ln S^*)^2}{4\theta^2} - \frac{\ln S^*}{4\theta} - \frac{(\ln S^*)^2}{2\theta^2} - \frac{(\ln S^*)^2}{4\theta^2} + \right. \\
&\quad \left. \frac{\ln S^*}{4\theta} + \frac{(\ln S^*)^2}{4\theta^2} - \frac{\ln S^*}{4\theta} + \frac{1}{4} + \frac{\ln S^*}{4\theta} \right) + \Delta Y_1^S \left( \frac{\theta - \ln S^* - \theta}{2\theta^2 S^*} \right) \\
&= \Delta Y_1^S \left( \frac{\ln S^* + \theta}{2\theta S^*} \right) \left( \frac{(\ln S^*)^2}{4\theta^2} - \frac{(\ln S^*)^2}{2\theta^2} + \frac{1}{4} \right) + \Delta Y_1^S \left( -\frac{\ln S^*}{2\theta^2 S^*} \right) \\
&= \Delta Y_1^S \left[ \left( \frac{\ln S^* + \theta}{2\theta S^*} \right) \left( -\frac{(\ln S^*)^2}{4\theta^2} + \frac{1}{4} \right) - \frac{\ln S^*}{2\theta^2 S^*} \right] \\
&= \Delta Y_1^S \left[ \frac{1}{2\theta S^*} \left( -\frac{(\ln S^*)^3}{4\theta^2} + \frac{\ln S^*}{4} - \frac{(\ln S^*)^2}{4\theta} + \frac{\theta}{4} - \frac{\ln S^*}{\theta} \right) \right] \\
&= \Delta Y_1^S \left[ \frac{1}{2\theta S^*} \left( \frac{-\ln S^* + \theta^2 \ln S^* - \theta (\ln S^*)^2 + \theta^3 - 4\theta \ln S^*}{4\theta^2} \right) \right] \\
&= \Delta Y_1^S \left[ \frac{-\ln S^* + \theta^2 \ln S^* - \theta (\ln S^*)^2 + \theta^3 - 4\theta \ln S^*}{8\theta^3 S^*} \right] \tag{75}
\end{aligned}$$

$$\frac{d^2 \Delta Y_2^S}{dS^* d\theta} = \Delta Y_2^S \left[ \frac{-\ln S^* + \theta^2 \ln S^* - \theta (\ln S^*)^2 + \theta^3 - 4\theta \ln S^*}{8\theta^3 S^*} \right]. \tag{76}$$

Note that  $\Delta Y_1^S$  and  $\Delta Y_2^S$  are always positive, as is  $8\theta^3 S^*$ . Therefore, I can show that  $\frac{d^2 \Delta Y_j^S}{dS^* d\theta} > 0$  by showing that the numerator of the term in brackets in 75 and 76 is positive, using the definitions of  $i^L$ ,  $i^H$  and  $(i^H - i^L)$  in 50, 51 and 46, as follows:

$$\begin{aligned}
& -\ln S^* + \theta^2 \ln S^* - \theta (\ln S^*)^2 + \theta^3 - 4\theta \ln S^* > 0 \\
& -2\theta (\ln S^*)^2 \left[ \frac{\ln S^*}{2\theta} + \frac{1}{2} \right] + 2\theta^3 \left[ \frac{\ln S^*}{2\theta} + \frac{1}{2} \right] - 4\theta \ln S^* > 0 \\
& \quad i^L 2\theta [\theta^2 - (\ln S^*)^2] - 4\theta \ln S^* > 0 \\
& \quad i^L 2\theta (\theta - \ln S^*) (\theta + \ln S^*) - 4\theta \ln S^* > 0 \\
& \quad i^L 8\theta^3 \left( \frac{1}{2} - \frac{\ln S^*}{2\theta} \right) \left( \frac{1}{2} + \frac{\ln S^*}{2\theta} \right) - 4\theta \ln S^* > 0 \\
& \quad 8\theta^3 (i^L)^2 i^H - 4\theta \ln S^* > 0 \\
& \quad 2\theta (i^L)^2 i^H - \frac{\ln S^*}{\theta} > 0 \\
& \quad 2\theta (i^L)^2 i^H + (i^H - i^L) > 0. \tag{77}
\end{aligned}$$

Thus  $S^*$  and  $\theta$  are complements in the gains from trade with trading costs, in the special case where  $\bar{A} = 1$ .

Note also that the gains from trade with social skills are increasing in  $\theta$ :

$$\begin{aligned}
\frac{d\Delta Y_1^S}{d\theta} &= \Delta Y_1^S \left( -\frac{\ln S^*}{2\theta^2} \left[ \theta \left( -\frac{\ln S^*}{2\theta} + \frac{1}{2} \right) + \ln S^* \right] + \left( \frac{\ln S^*}{2\theta} + \frac{1}{2} \right) \left[ \left( -\frac{\ln S^*}{2\theta} + \frac{1}{2} \right) + \theta \frac{\ln S^*}{2\theta^2} \right] \right) \\
&= \Delta Y_1^S \left( \frac{(\ln S^*)^2}{4\theta^2} - \frac{\ln S^*}{4\theta} - \frac{(\ln S^*)^2}{2\theta^2} - \frac{(\ln S^*)^2}{4\theta^2} + \frac{\ln S^*}{4\theta} + \frac{(\ln S^*)^2}{4\theta^2} - \frac{\ln S^*}{4\theta} + \frac{1}{4} + \frac{\ln S^*}{4\theta} \right) \\
&= \Delta Y_1^S \left( \frac{(\ln S^*)^2}{4\theta^2} - \frac{(\ln S^*)^2}{2\theta^2} + \frac{1}{4} \right) \\
&= \Delta Y_1^S \left( -\frac{(\ln S^*)^2}{4\theta^2} + \frac{1}{4} \right) \\
&= \Delta Y_1^S \left( \frac{1}{2} - \frac{\ln S^*}{2\theta} \right) \left( \frac{1}{2} + \frac{\ln S^*}{2\theta} \right) \\
&= \Delta Y_1^S i^H i^L > 0 \\
\frac{d\Delta Y_2^S}{d\theta} &= \Delta Y_2^S i^H i^L > 0.
\end{aligned} \tag{78}$$

### 3.7 Complementarity of $\theta$ and Social Skill in Production

In this section, I consider the situation where there are two sectors, each employing two workers. Sector 1 has a higher value of  $\theta$  and therefore more dispersion in productivity (a steeper comparative advantage schedule) compared with sector 2:  $\theta_1 > \theta_2$ . Also imagine indexing all possible sets of two workers by  $S^*$ . Define set A to be the set containing the two workers with the highest value of  $S^*$  (i.e. the two workers with the highest individual values of  $S_j$ ), and set B to be the set containing the remaining two workers:  $S_A^* > S_B^*$ . All workers have identical ability  $A$  (so  $\bar{A} = 1$  and  $\omega = 1$ ).

I want to show that - while wages in both sectors will be higher for set A workers than set B workers - wages for set A workers in sector 1 will be higher than in sector 2. This is equivalent to showing that the second derivative of wages with respect to  $S^*$  and  $\theta$  is positive. Since wages are identical to output scaled by a constant, I can take the derivatives with respect to output rather than wages.

To derive these expressions, I use the result from 3.6 that  $S^*$  and  $\theta$  are complements in the gains from trade. Note that:

$$Y_j^S = \frac{Y_j^S}{Y_j^A} Y_j^A = \Delta Y_j^S Y_j^A. \tag{79}$$

In other words, production under task trade with trading costs is equivalent to the gains from trade with social skills multiplied by production under autarky.

Taking the derivative of production with trading costs with respect to social skill using 79 yields:

$$\begin{aligned}
\frac{dY_1^S}{dS^*} &= \frac{d\Delta Y_1^S}{dS^*} Y_1^A + \Delta Y_1^S \frac{dY_1^A}{dS^*} \\
&= \frac{d\Delta Y_1^S}{dS^*} Y_1^A > 0
\end{aligned} \tag{80}$$

$$\begin{aligned}
\frac{dY_2^S}{dS^*} &= \frac{d\Delta Y_2^S}{dS^*} Y_2^A + \Delta Y_2^S \frac{dY_2^A}{dS^*} \\
&= \frac{d\Delta Y_2^S}{dS^*} Y_2^A > 0.
\end{aligned} \tag{81}$$

Note that I have shown in 73 and 74 that the gains from trade,  $\Delta Y_j^S$ , are increasing in  $S^*$ . In addition,  $\frac{dY_j^A}{dS^*} = 0$  because  $S^*$  does not appear in the expression for production under autarky (23). Thus production

is increasing in  $S^*$  for both workers.

Next, I take the second derivative of 80 and 81 with respect to  $S^*$  and  $\theta$ :

$$\frac{d^2 Y_1^S}{dS^* d\theta} = \frac{d^2 \Delta Y_1^S}{dS^* d\theta} Y_1^A + \frac{d\Delta Y_1^S}{dS^*} \frac{dY_1^A}{d\theta} > 0 \quad (82)$$

$$\frac{d^2 Y_2^S}{dS^* d\theta} = \frac{d^2 \Delta Y_2^S}{dS^* d\theta} Y_2^A + \frac{d\Delta Y_2^S}{dS^*} \frac{dY_2^A}{d\theta} > 0. \quad (83)$$

I have shown in 75, 76 and 77 that  $\frac{d^2 \Delta Y_j^S}{dS^* d\theta} > 0$ , and in 73 and 74 that  $\frac{d\Delta Y_j^S}{dS^*} > 0$ .

Thus all that remains to verify the claim in 82 and 83 that  $\frac{d^2 Y_j^S}{dS^* d\theta} > 0$  is to show that  $\frac{dY_j^A}{d\theta} > 0$ . In section 1.3, I argued that the functional form for  $\gamma(i)$  is consistent with a log-normal distribution for the underlying task productivities. If productivity in task  $t$  for worker  $j$  is  $a_j(t) \sim \ln \mathcal{N}(\mu_j, \sigma^2)$ , as in 7, then mean productivity for worker  $j$  is  $\exp(\mu_j + \sigma^2/2)$ , which increasing in  $\sigma^2$ . Since  $\theta \approx 2\sigma$ , mean productivity for worker  $j$  should be increasing in  $\theta$ , as well. Under autarky, production is an increasing function of worker  $j$ 's productivity in each task (23). Thus an increase in  $\theta$  should raise worker  $j$ 's mean productivity level and hence the worker's total productivity under autarky. Note that the inequalities in 82 and 83 hold even if  $\frac{dY_j^A}{d\theta} = 0$ ; the only necessary condition is that  $\frac{dY_j^A}{d\theta}$  not be negative.

I can use the same approach to show that production (and therefore wages) are increasing in  $\theta$  when  $\bar{A} = 1$ :

$$\frac{dY_1^S}{d\theta} = \frac{d\Delta Y_1^S}{d\theta} Y_1^A + \Delta Y_1^S \frac{dY_1^A}{d\theta} \quad (84)$$

$$\frac{dY_2^S}{d\theta} = \frac{d\Delta Y_2^S}{d\theta} Y_2^A + \Delta Y_2^S \frac{dY_2^A}{d\theta}. \quad (85)$$

I have shown in 78 that  $\frac{d\Delta Y_j^S}{d\theta} > 0$ .
